# Supplementary material for: Triarylboryl-functionalized dibenzoylmethane and its phosphorescent platinum(ii) complexes
Source: Royal Society of Chemistry journal article supplement (doi:10.1039/c3dt51276b), 2013-01-01
Supplement: c3dt51276b.pdf [file c3dt51276b.pdf]

## Supporting Information

### **Triarylboryl-Functionalized Dibenzoylmethane and Its Phosphorescent Platinum(II) Complexes**

Barry A. Blight, Soo-Byung Ko, Jiasheng Lu, Larissa F. Smith and Suning Wang\*

Department of Chemistry, Queen's University,  
90 Bader Lane, Kingston, Ontario, K7L 3N6, Canada

## **Table of Contents**

- S1. General Experimental
- S2. Synthesis of compound **2**
- S3. Synthesis of compound **1**
- S4. Synthesis of compound **3**
- S5. Synthesis of compound **4**
- S6. NMR confirmation of regiochemistry ( $^1\text{H}$  & NOESY)
- S7. UV-Vis and phosphorescent spectra of compounds **1, 3, 4**
- S8. Solvent-dependent absorption and phosphorescent spectra in solution
- S9. Cyclic voltammetry diagrams of compounds **3** and **4**
- S10. Fluoride titrations
- S11. TD-DFT computational results of compounds **3** and **4**
- S12. X-ray crystal structural data of compounds **3** and **4**

## **S1. General Experimental**

Dry solvents were obtained from a solvent purification system (Innovative Technologies, Inc.). Reactions that required oxygen-free environments were conducted under an inert nitrogen atmosphere in oven-dried glassware using standard Schlenk techniques unless otherwise stated.  $^1\text{H}$  and  $^{13}\text{C}$  NMR spectra were recorded using a Bruker Avance 400 spectrometer as noted. All deuterated solvents were purchased from Cambridge Isotopes and used as is, without further drying. UV-Vis measurements were acquired using a Varian Cary 50 Bio Spectrometer. Excitation and emission spectra were recorded using a Photon Technologies International Quanta Master model C-60 spectrometer. High-resolution mass spectra were obtained using a Water/Micromass GC-TOF EI-MS spectrometer. Elemental analyses were conducted by the Elemental Analysis Service at the University of Montreal, Department of Chemistry. All reagents were obtained from the Sigma-Aldrich chemical company. Potassium tetrachloroplatinate was purchased from Pressure Chemicals. Crystal structures were obtained at 180 K using a Bruker AXS Apex II X-ray diffractometer (50 kV, 30 mA, Mo  $\text{K}\alpha$  radiation).

## **S2. Synthesis of Compound 2**

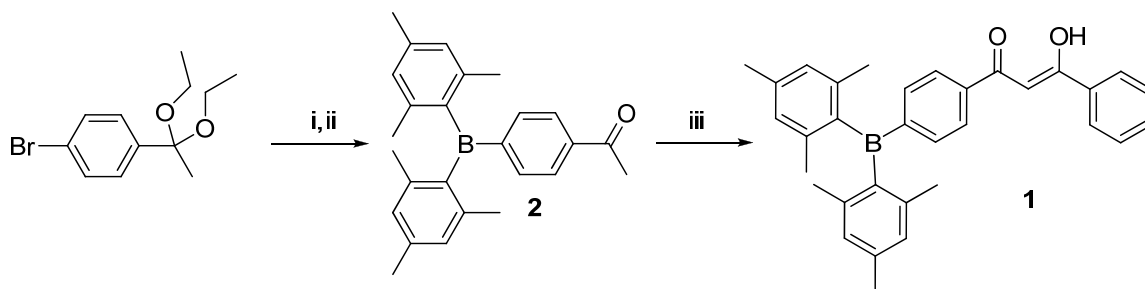

**Scheme S1.**

Reaction sequence for the synthesis of ligand **1**; i) *n*-BuLi, THF,  $-78^\circ\text{C}$ ,  $\text{Mes}_2\text{BF}$ , 18h; ii) hydrolysis of ketal with 2M HCl; iii) LHMDS, THF,  $0^\circ\text{C}$ , BzCl, 2h.

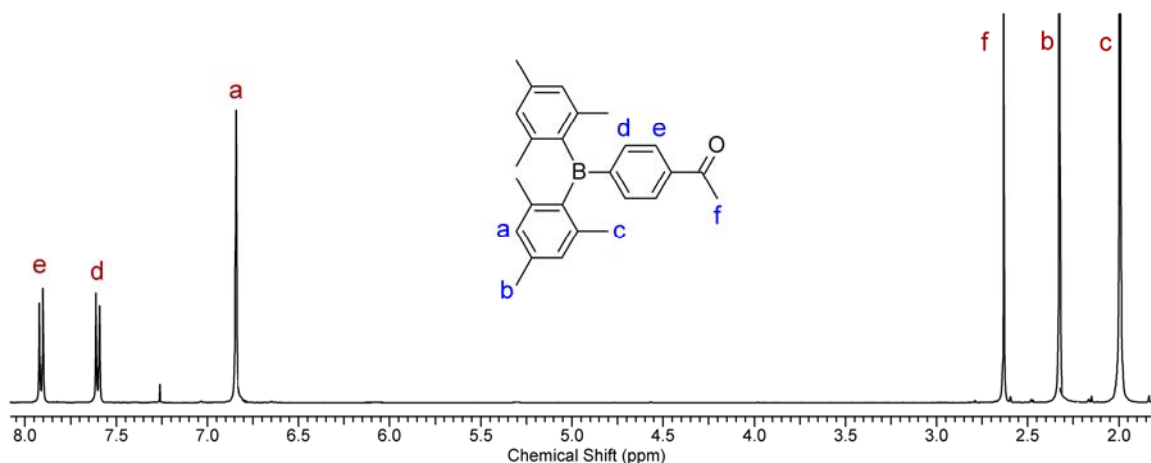

**Figure S1:** <sup>1</sup>H NMR (400 MHz, 298K, CDCl<sub>3</sub>) of compound 2.

**1-(4-(dimesitylboryl)phenyl)ethanone (2):** Under N<sub>2</sub>, 4-bromoacetophenone diethylketal (3.05g, 0.011 mol, 1 eq.) was dissolved in anhydrous THF (125 mL) and cooled to -78°C. 1.6 M *n*-BuLi (7.7 mL, 0.012 mol, 1.05 eq.) was added dropwise over 40 minutes and then allowed to stir for 60 min at -78°C. In one portion, solid dimesitylboron fluoride (3.0 g, 0.011 mol 1 eq.) was added to the reaction mixture at -78°C, and the reaction was allowed to warm to room temperature while stirring over night. The reaction was quenched and stirred with 2 M HCl and extracted with diethylether and washed with distilled water. The organic layer was dried with MgSO<sub>4</sub>, filtered, and concentrated under reduced pressure to afford a pale yellow solid. The residue was purified by column chromatography (1:5 hexanes/DCM) to afford a colorless oil that solidified upon standing (3.36 g, 9.1 mmol, 83% yield). <sup>1</sup>H NMR (400MHz, 298 K, CDCl<sub>3</sub>): δ 7.91 (d, *J* = 8.3 Hz, 2H), 7.59 (d, *J* = 8.3 Hz, 2H), 6.84 (s, 4H), 2.63 (s, 3H), 2.32 (s, 6H), 1.98 (s, 12H); <sup>13</sup>C NMR (100MHz, 298 K, CDCl<sub>3</sub>): δ 198.5, 141.4, 140.8, 139.2, 138.8, 135.7, 128.3, 127.6, 26.8, 23.4, 21.2; <sup>11</sup>B NMR (128MHz, 298 K, CDCl<sub>3</sub>): δ 78.7; Anal. Calcd for C<sub>26</sub>H<sub>29</sub>BO: C, 84.78; H, 7.94; Found: C, 84.46; H, 8.17.

### **S3. Synthesis of Compound 1**

Compound 2 (0.6 g, 1.6 mmol, 1 eq.) was dissolved in anhydrous THF (10 mL) and cooled to 0°C. Separately, lithium hexamethyldisilylamide (LHMDS, 0.57 g, 3.4 mmol 2.1 eq.) was dissolved in anhydrous THF (15 mL) and then quickly added dropwise to the cooled THF solution of 2. The reaction was allowed to stir for 20 min allowing enolate to quantitatively form. Benzoyl chloride (0.18 mL, 1.55

mmol, 0.95 eq.) was added dropwise to the reaction mixture (still cooled at 0°C), the reaction was allowed to stir for 1h at 0°C, and then 1h room temperature. The reaction mixture was diluted with diethylether, and sequentially washed with a sat. NH<sub>4</sub>Cl solution, water and brine. The organic layer was then dried with MgSO<sub>4</sub>, filtered, and concentrated under reduced pressure. The crude product was recrystallized in DCM/MeOH to afford yellow crystals (0.67 g, 1.4 mmol, 87% yield). <sup>1</sup>H NMR (400 MHz, 298 K, CDCl<sub>3</sub>): δ 16.87 (s, 1H), 8.02 (d, *J* = 7.1 Hz, 2H), 7.95 (d, *J* = 8.1 Hz, 2H), 7.64 (d, *J* = 8.1 Hz, 2H), 7.57 (t, *J* = 7.1 Hz, 1H), 7.50 (dd, *J* = 7.1 Hz, 7.1 Hz), 6.97 (s, 1H), 6.86 (s, 4H), 2.34 (s, 6H), 2.03 (s, 12H); <sup>13</sup>C NMR (100MHz, 298 K, CDCl<sub>3</sub>): δ 186.7, 184.8, 141.6, 140.9, 139.2, 137.9, 136.1, 135.7, 132.6, 128.7, 128.4 (2C), 123.3, 126.5, 93.7, 23.5, 21.3; <sup>11</sup>B NMR (128 MHz, 298 K, CDCl<sub>3</sub>): δ 83.5; Anal. Calcd for C<sub>33</sub>H<sub>33</sub>BO<sub>2</sub>: C, 83.90; H, 7.04. Found: C, 83.70; H, 7.17.

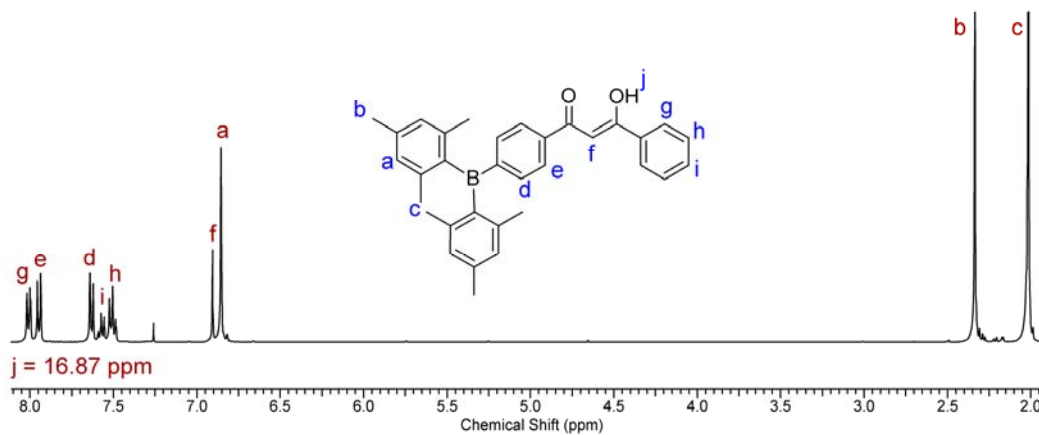

**Figure S2:** <sup>1</sup>H NMR (400 MHz, 298K, CDCl<sub>3</sub>) of compound **1**.

### S4. Synthesis of Compound 3

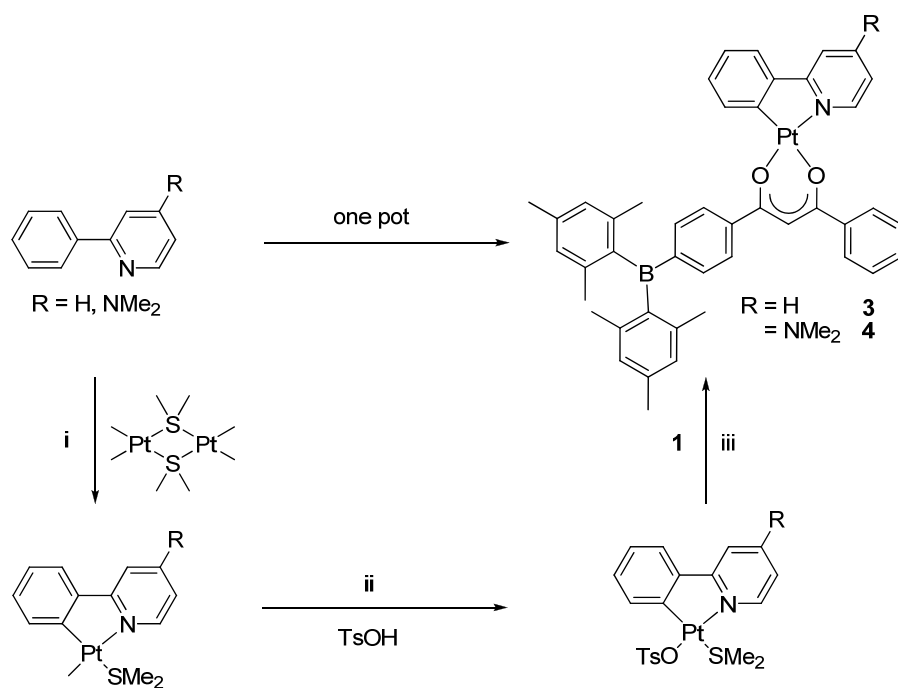

**Scheme S2.** Reaction sequence for the formation of platinum(II) complexes **3** and **4**; i) THF, rt, 1h; ii) THF, rt 1h; iii) KOMe, THF, rt, 1h.

**Compound 3:** In a 20 mL sample vial, 2-phenylpyridine (27 mg, 0.17 mmol, 1 eq.) was dissolved in THF (3ml), and [Pt(SMe<sub>2</sub>)Me<sub>2</sub>]<sub>2</sub> (50 mg, 0.087 mmol 0.5 eq.) was added in one portion to the reaction mixture. The mixture was stirred for 1h at room temperature. *p*-Toluenesulfonic acid (34 mg, 0.17 mmol, 1 eq.) dissolved in THF (2 mL) was then added dropwise to the reaction mixture which was allowed to stir for 1h at room temperature. In a separate vial, **1** (91 mg, 0.19 mmol, 1.1 eq.) was dissolved in THF (3 mL), and converted to the potassium salt by dropwise addition of KOMe (1 equivalent relative to **1**). The K·**1** solution was then added dropwise to the reaction mixture containing phenylpyridine and the mixture was allowed to stir for 1h at room temperature. The reaction was then diluted in DCM and washed with water and brine. The organic layer was then dried with MgSO<sub>4</sub>, filtered, and concentrated under reduced pressure. The crude product was purified by column

chromatography (3:1 hexanes EtOAc) to afford an orange powder (93 mg, 0.11 mmol, 67% yield).  $^1\text{H}$  NMR (400MHz, 298 K,  $\text{CDCl}_3$ ):  $\delta$  9.17 (d,  $J = 6.6$  Hz, 1H,  $\text{H}_j$ ), 8.08 (d,  $J = 8.1$  Hz, 4H,  $\text{H}_{e,g}$ ), 7.87 (dd,  $J = 6.6$  Hz, 7.3 Hz, 1H,  $\text{H}_i$ ), 7.77 (d,  $J = 7.1$  Hz, 1H,  $\text{H}_q$ ), 7.70, (d,  $J = 8.3$  Hz, 1H,  $\text{H}_m$ ), 7.63 (d,  $J = 7.8$  Hz, 2H,  $\text{H}_d$ ) 7.61, (t,  $J = 7.1$  Hz, 1H,  $\text{H}_i$ ) 7.52 (m, 3H,  $\text{H}_{h,n}$ ), 7.27 (dd,  $J = 7.1$  Hz, 7.1 Hz, 1H,  $\text{H}_p$ ), 7.21 (dd,  $J = 6.6$  Hz, 7.3, 1H,  $\text{H}_k$ ), 7.15 (dd,  $J = 7.1$  Hz, 7.1 Hz, 1H,  $\text{H}_o$ ), 6.87 (s, 4H,  $\text{H}_d$ ), 6.85 (s, 1H,  $\text{H}_f$ ), 2.35 (s, 6H,  $\text{H}_a$ ), 2.06 (s, 12H,  $\text{H}_c$ );  $^{13}\text{C}$  NMR and  $^{11}\text{B}$  NMR spectra were not successfully recorded due to poor solubility, and extremely broadened signals of the triarylboron moiety. Anal. Calcd for  $\text{C}_{44}\text{H}_{40}\text{BNO}_2\text{Pt}$ : C, 64.39; H, 4.91; N, 1.71. Found: C, 64.41; H, 4.93; N, 1.61.

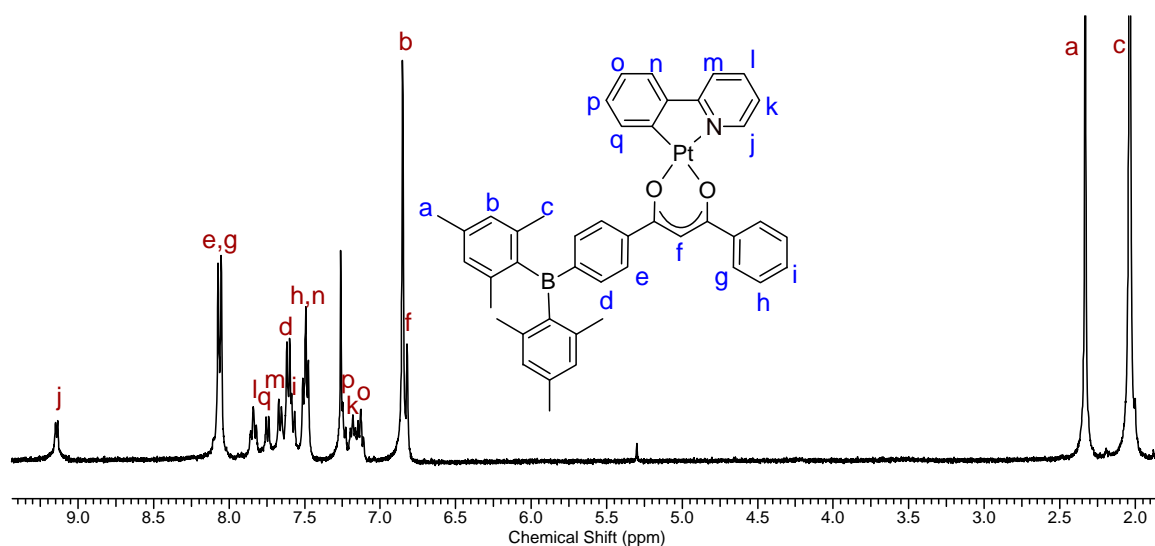

**Figure S3:**  $^1\text{H}$  NMR (400 MHz, 298K,  $\text{CDCl}_3$ ) of compound **3**.

### **S5. Synthesis of Compound 4**

The same procedure and proportions for **3** were employed for the synthesis of **4**, which resulted in the isolation of an orange powder (90 mg, 0.10 mmol, 61% yield).  $^1\text{H}$  NMR (400MHz, 298 K,  $\text{CDCl}_3$ ):  $\delta$  8.61 (d,  $J = 6.8$  Hz, 1H,  $\text{H}_j$ ), 8.08 (d,  $J = 7.8$  Hz, 4H,  $\text{H}_{e,g}$ ), 7.73 (d,  $J = 6.8$  Hz, 1H,  $\text{H}_q$ ), 7.61 (d,  $J = 8.1$  Hz, 2H,  $\text{H}_d$ ), 7.58, (t,  $J = 7.6$  Hz, 1H,  $\text{H}_i$ ), 7.48 (dd,  $J = 7.6$  Hz, 7.6 Hz, 2H,  $\text{H}_h$ ) 7.45, (d,  $J = 7.1$  Hz, 1H,

$H_n$ ) 7.21 (dd,  $J = 6.8$  Hz, 7.6 Hz, 1H,  $H_p$ ) 7.10 (dd,  $J = 7.1$  Hz, 7.6 Hz, 1H,  $H_o$ ) 6.86 (s, 4H,  $H_b$ ), 6.84 (d,  $J = 2.8$  Hz, 1H,  $H_m$ ), 6.81 (s, 1H,  $H_f$ ), 6.47 (dd,  $J = 2.8$  Hz, 6.8 Hz, 1H,  $H_k$ ) 3.18 (s, 6H,  $H_l$ ), 2.35 (s, 6H,  $H_a$ ), 2.05 (s, 12H,  $H_c$ );  $^{13}\text{C}$  NMR and  $^{11}\text{B}$  NMR spectra were not successfully recorded due to poor solubility, and extremely broadened signals of the triarylboron moiety. Anal. Calcd for  $\text{C}_{46}\text{H}_{45}\text{BN}_2\text{O}_2\text{Pt} \cdot 2\text{H}_2\text{O}$ : C, 61.40; H, 5.49; N, 3.11. Found: C, 61.14; H, 5.04; N, 3.12.

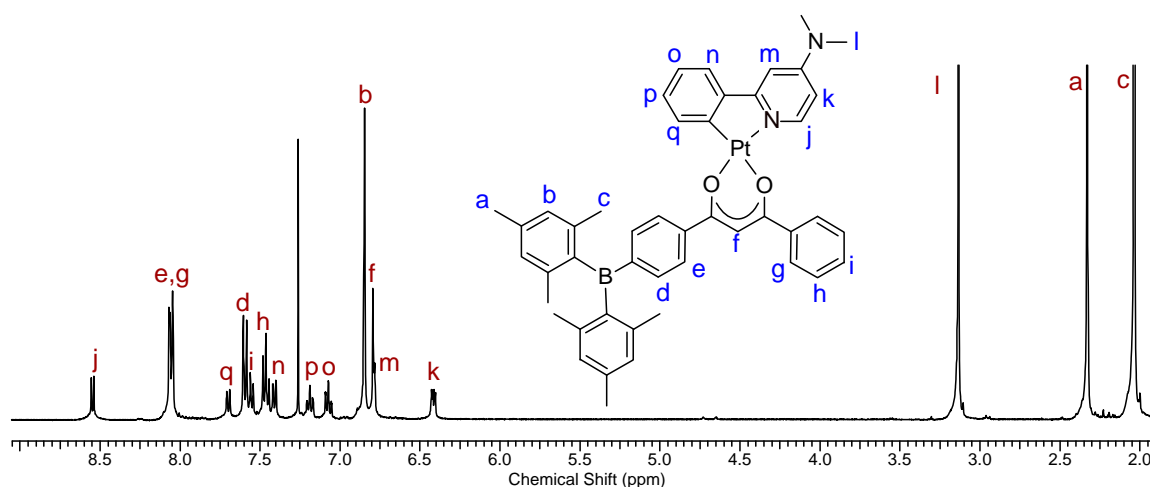

**Figure S4:**  $^1\text{H}$  NMR (400 MHz, 298K,  $\text{CDCl}_3$ ) of compound **4**.

### **S6. NMR Confirmation of Regiochemistry ( $^1\text{H}$ & NOESY).**

Assignments for the  $^1\text{H}$  NMR spectra above were determined/confirmed using  $^1\text{H}$  NMR, COSY, and NOESY in  $\text{CDCl}_3$ , however, ambiguity associated with protons  $H_e$  and  $H_g$  and their respective NOEs with  $H_j$  and  $H_q$  remained. Thus, spectra taken in  $\text{CDCl}_3/\text{C}_6\text{D}_6$  (50:50) were employed to separate the signal overlap of protons  $H_e$  and  $H_g$ . With this NOEs between  $H_e$ - $H_q$  and  $H_g$ - $H_j$  were visible in both compounds **3** and **4**.



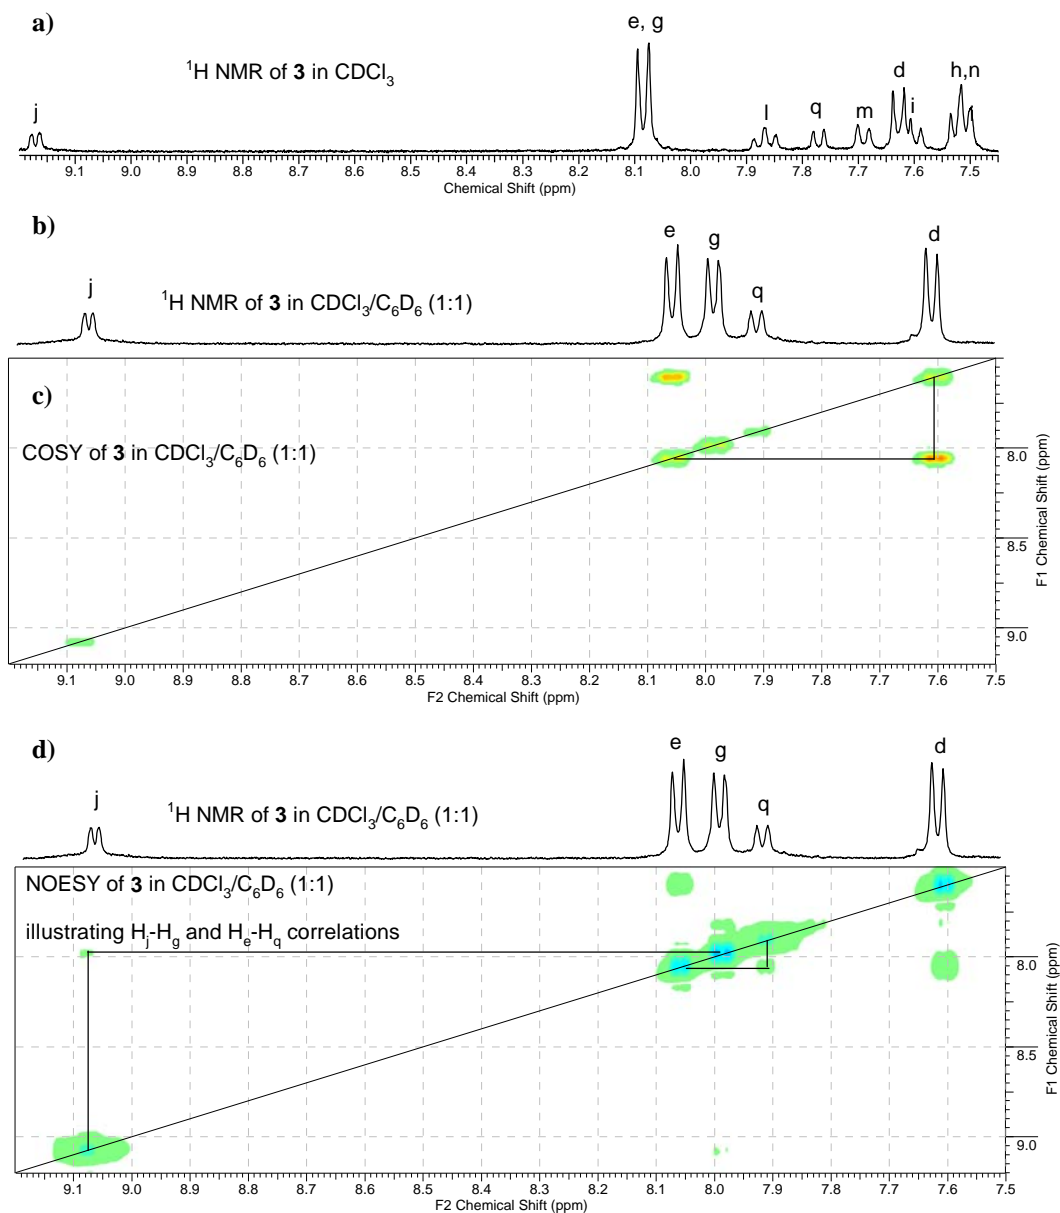

**Figure S5:** Illustration of isomer identification of platinum(II) complex **3**; a)  $^1\text{H}$  NMR of **3** in  $\text{CDCl}_3$ ; b)  $^1\text{H}$  NMR of **3** in  $\text{CDCl}_3/\text{C}_6\text{D}_6$  (1:1); c) COSY of **3** in  $\text{CDCl}_3/\text{C}_6\text{D}_6$  illustrating  $\text{H}_e\text{-H}_d$  correlation; d)  $^1\text{H}$  NMR and NOESY of **3** in  $\text{CDCl}_3/\text{C}_6\text{D}_6$  illustrating  $\text{H}_j\text{-H}_g$  and  $\text{H}_e\text{-H}_q$  NOE correlations.

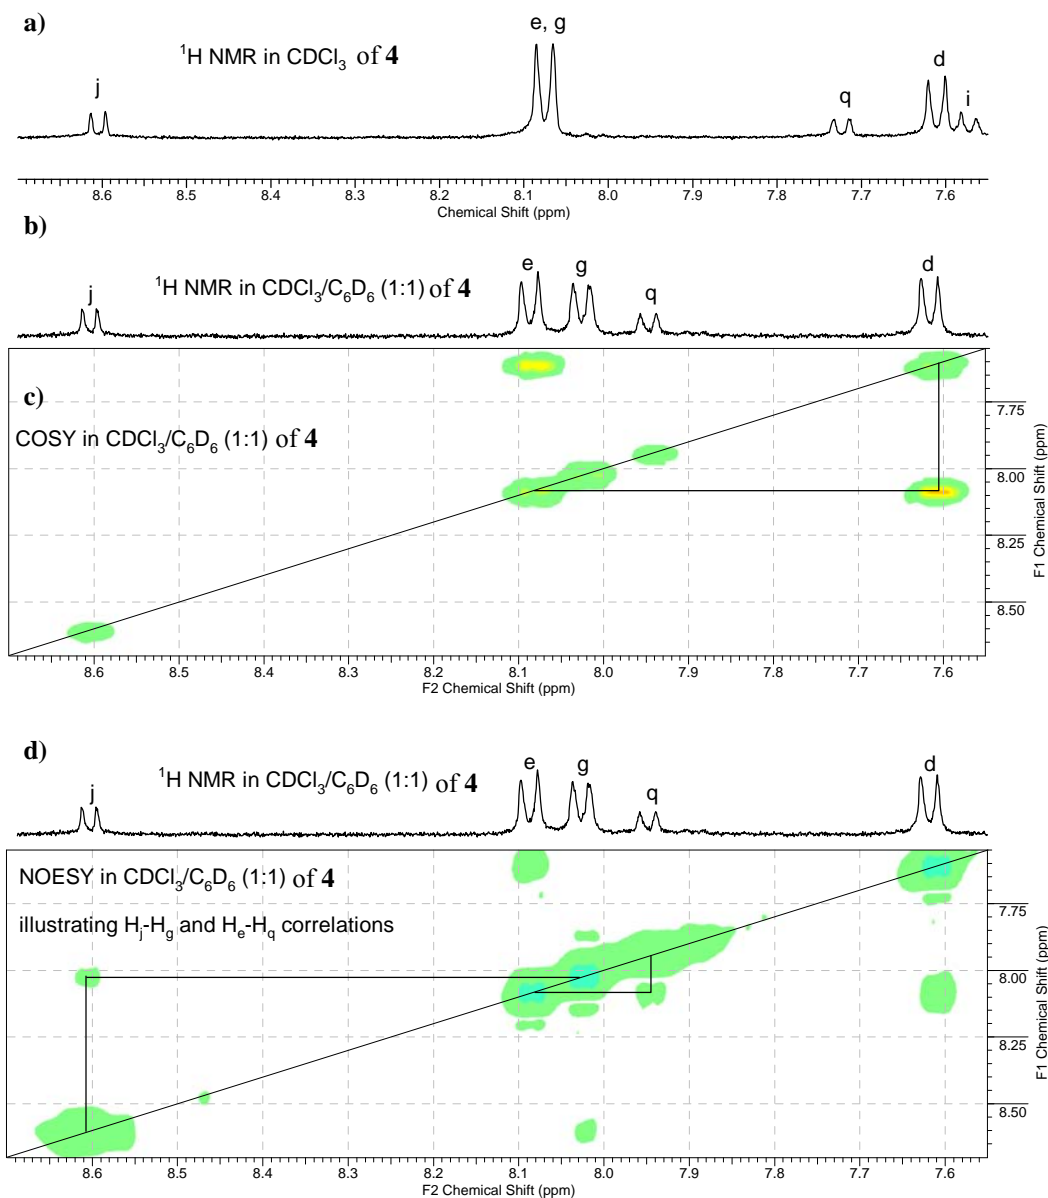

**Figure S6:** Illustration of isomer identification of platinum(II) complex **4**; a)  $^1\text{H}$  NMR of **4** in  $\text{CDCl}_3$ ; b)  $^1\text{H}$  NMR of **4** in  $\text{CDCl}_3/\text{C}_6\text{D}_6$  (1:1); c) COSY of **4** in  $\text{CDCl}_3/\text{C}_6\text{D}_6$  illustrating  $\text{H}_e\text{-H}_d$  correlation; d)  $^1\text{H}$  NMR and NOESY of **4** in  $\text{CDCl}_3/\text{C}_6\text{D}_6$  illustrating  $\text{H}_j\text{-H}_g$  and  $\text{H}_e\text{-H}_q$  NOE correlations.

### S7. UV-Vis and luminescent Spectra of Compounds 1, 3 and 4

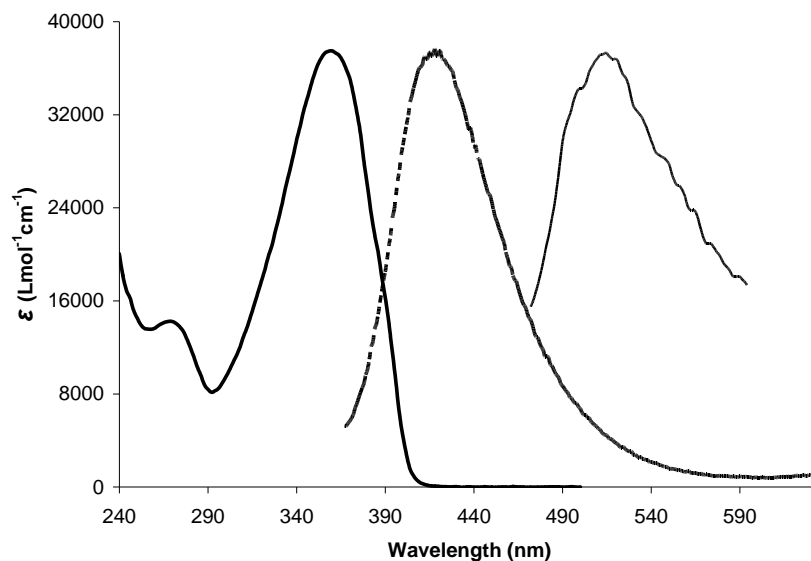

**Figure S7:** UV-vis (thick line;  $\lambda_{\max} = 358$  nm, 298K), normalized fluorescence (dashed line;  $\lambda_{\text{ex}} = 358$  nm,  $\lambda_{\text{em}} = 420$  nm), and normalized phosphorescent (thin line;  $\lambda_{\text{ex}} = 358$  nm,  $\lambda_{\text{em}} = 516$  nm, 77 K) spectra of ligand **1** in 2-methyltetrahydrofuran.

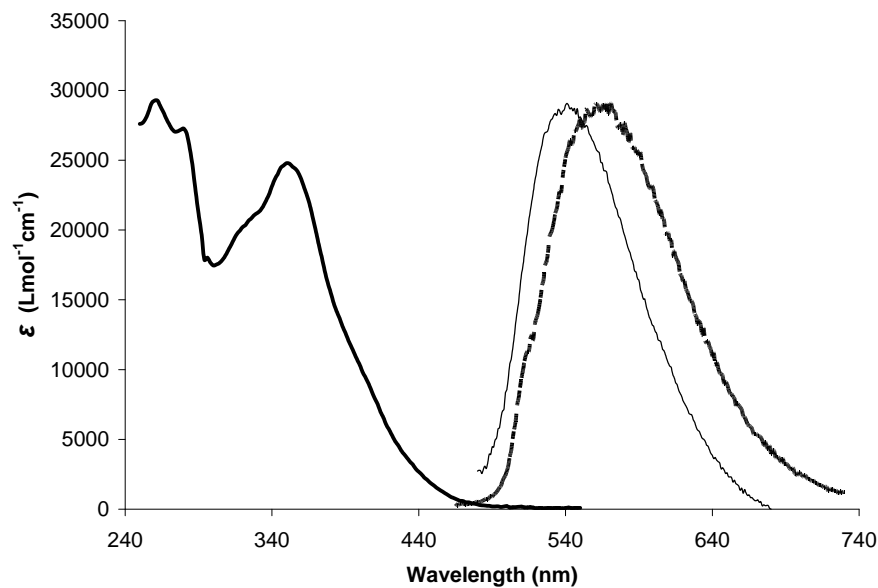

**Figure S8:** UV-vis (thick line;  $\lambda_{\max} = 350$  nm, 298K), normalized solid-state phosphorescent (thin line;  $\lambda_{\text{ex}} = 350$  nm,  $\lambda_{\text{em}} = 545$  nm) in 5 wt% PMMA thin film, and normalized phosphorescent (dashed line;  $\lambda_{\text{ex}} = 350$  nm,  $\lambda_{\text{em}} = 565$  nm) spectra of compound **3** in  $\text{CH}_2\text{Cl}_2$ .

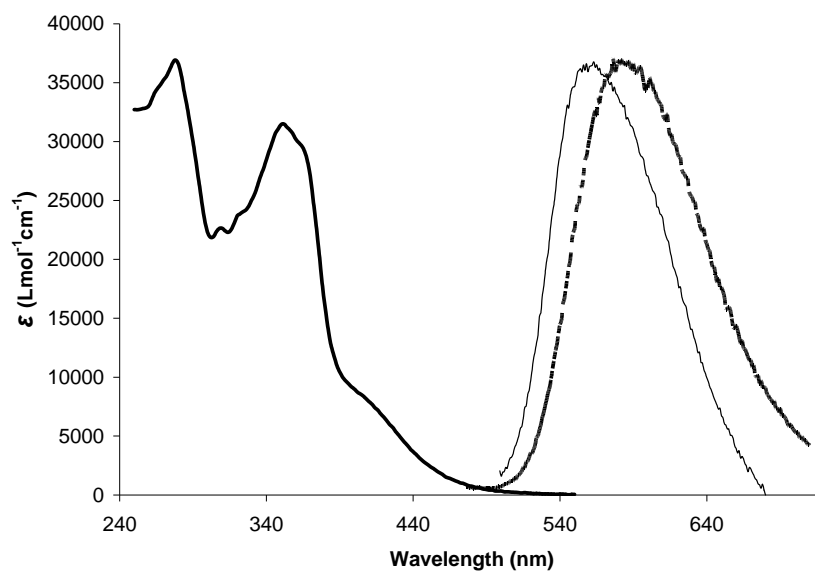

**Figure S9:** UV-vis (thick line;  $\lambda_{\text{max}} = 350$  nm, 298K), normalized solid-state phosphorescent (thin line  $\lambda_{\text{ex}} = 350$  nm,  $\lambda_{\text{em}} = 565$  nm) 5% loading in PMMA thin film, and normalized phosphorescent (dashed line;  $\lambda_{\text{ex}} = 350$  nm,  $\lambda_{\text{em}} = 587$  nm) spectra of compound **4** in  $\text{CH}_2\text{Cl}_2$ .

### S8. Solvent-Dependent Absorption and Luminescent Spectra in Solution

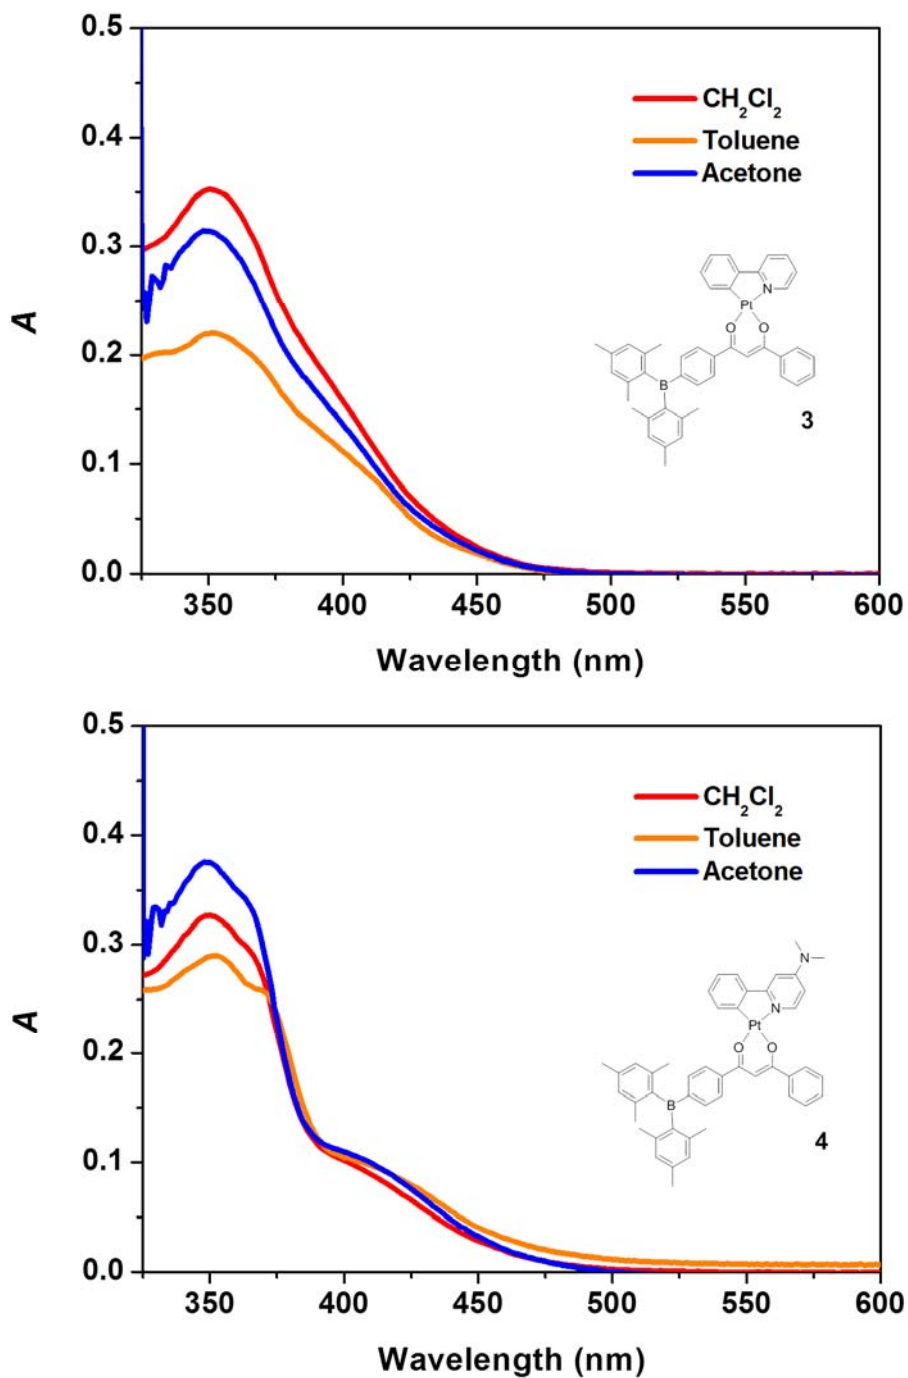

**Figure S10:** Normalized absorption spectra for **3** and **4** at  $1.0 \times 10^{-5}$  M in various solvents.

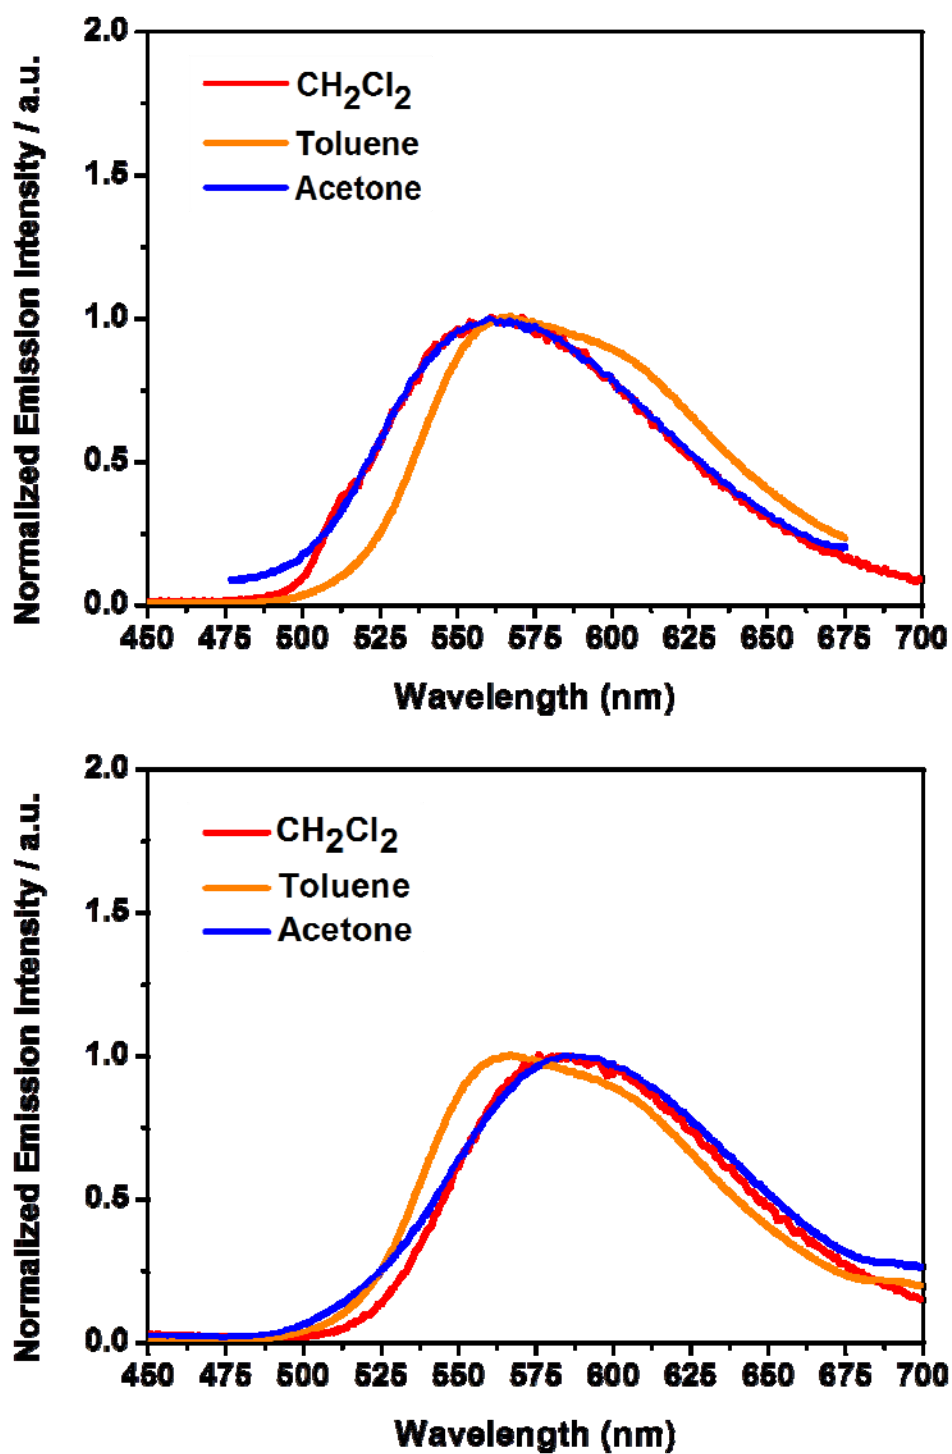

**Figure S11:** Normalized emission spectra for **3** (top) and **4** (bottom) at  $1.0 \times 10^{-5}$  M in various solvents.

### S9. Cyclic Voltammetry Diagrams of Compound 3 and 4

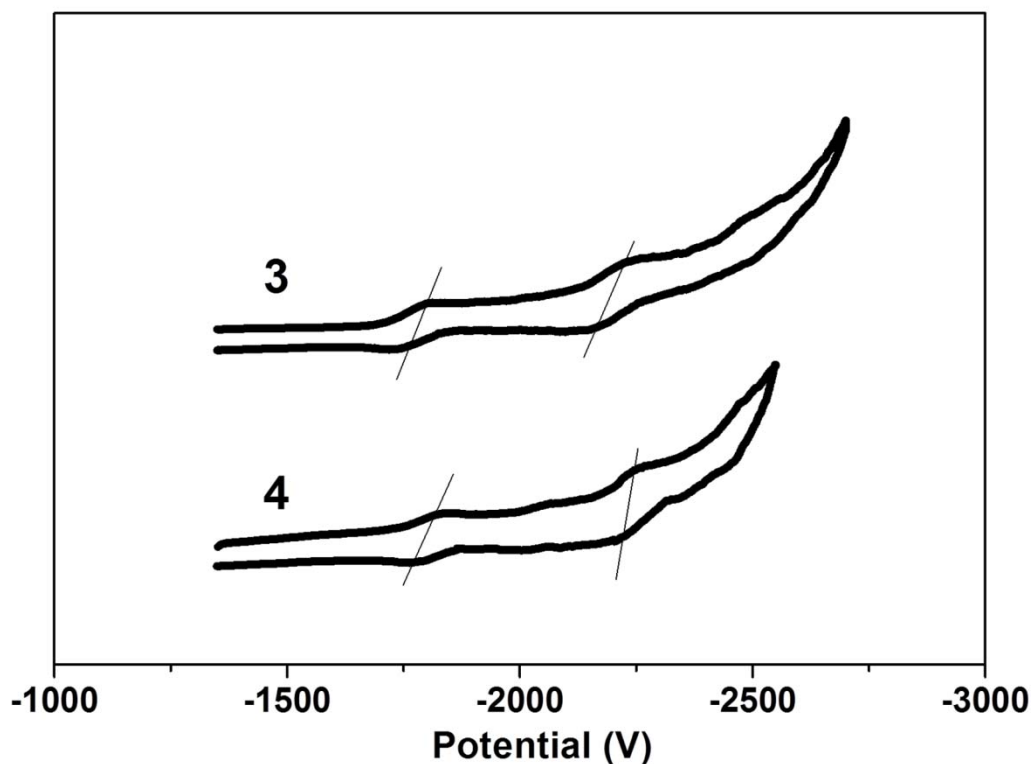

**Figure S12:** CV diagrams for Pt(II) complexes 3-4 recorded in DMF relative to  $\text{FcCp}_2^{0/+}$ .

**Table S1.** Electrochemical Data<sup>a</sup>

| Complex | $E_{1/2}^{\text{red1}}$ (V) | $E_{1/2}^{\text{red2}}$ (V) | Optical energy gap (eV) | HOMO (eV) <sup>b</sup> | LUMO (eV) <sup>c</sup> |
|---------|-----------------------------|-----------------------------|-------------------------|------------------------|------------------------|
| 3       | -1.77                       | -2.20                       | 2.58                    | -5.61                  | -3.03                  |
| 4       | -1.83                       | -2.23                       | 2.45                    | -5.42                  | -2.97                  |

<sup>a</sup> The CV were recorded in DMF solution containing 0.10 M  $(n\text{-Bu})_4\text{PF}_6$  as the electrolyte, relative to  $E^\circ(\text{Fc}/\text{Fc}^+) = 0.55$  V. <sup>b</sup> Estimated from the optical energy gap and the LUMO energy. <sup>c</sup> Estimated from the reduction potentials.

### S10. Fluoride Titration Results

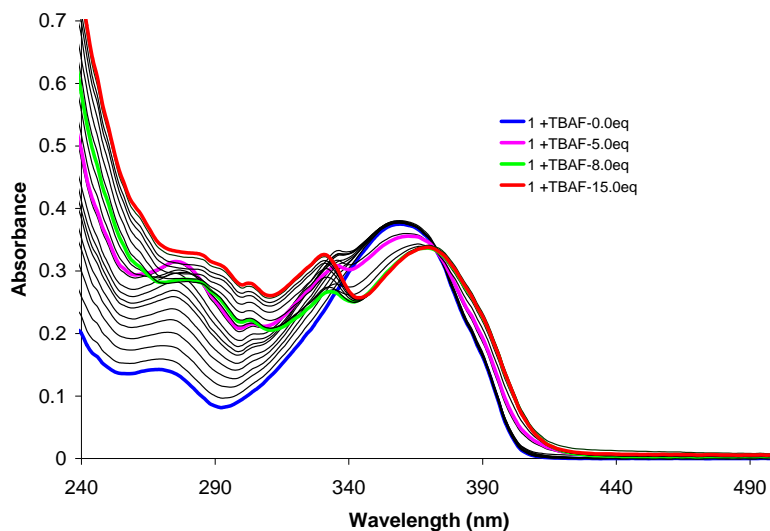

**Figure S13:** UV-Vis titration of ligand **1** ( $1 \times 10^{-5}$  M) with aliquots of TBAF ( $3 \times 10^{-3}$  M) in THF at 298 K.

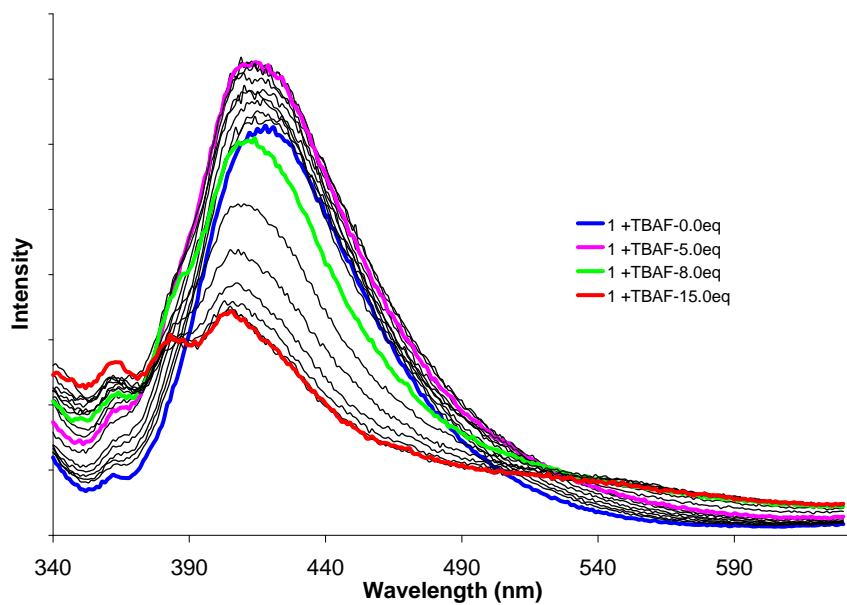

**Figure S14:** Fluorescence titration of ligand **1** ( $1 \times 10^{-5}$  M) with aliquots of TBAF ( $3 \times 10^{-3}$  M) in THF at 298 K ( $\lambda_{\text{ex}} = 358$  nm).



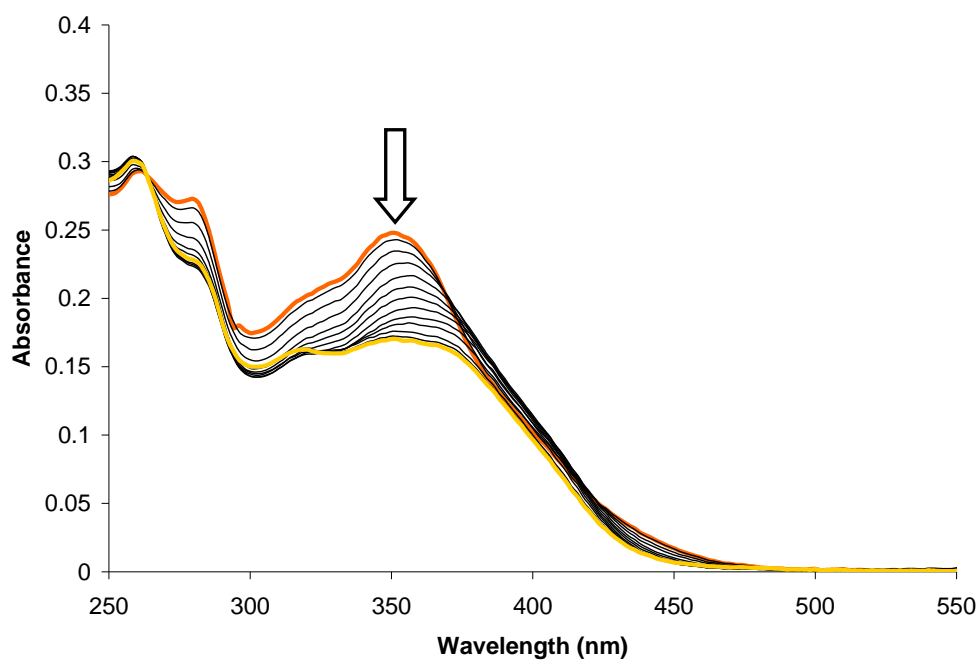

**Figure S15:** UV-Vis titration of compound **3** ( $1 \times 10^{-5}$  M) with aliquots of TBAF ( $3 \times 10^{-3}$  M) in DCM at 298 K.

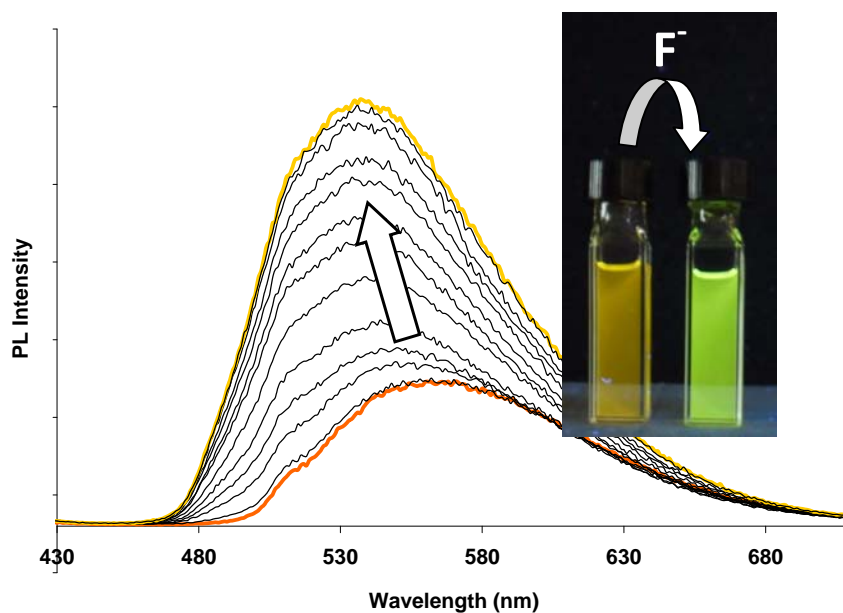

**Figure S16:** Phosphorescence titration of compound **3** ( $1 \times 10^{-5}$  M) with aliquots of TBAF ( $3 \times 10^{-3}$  M) in DCM at 298 K ( $\lambda_{\text{ex}} = 350$  nm).

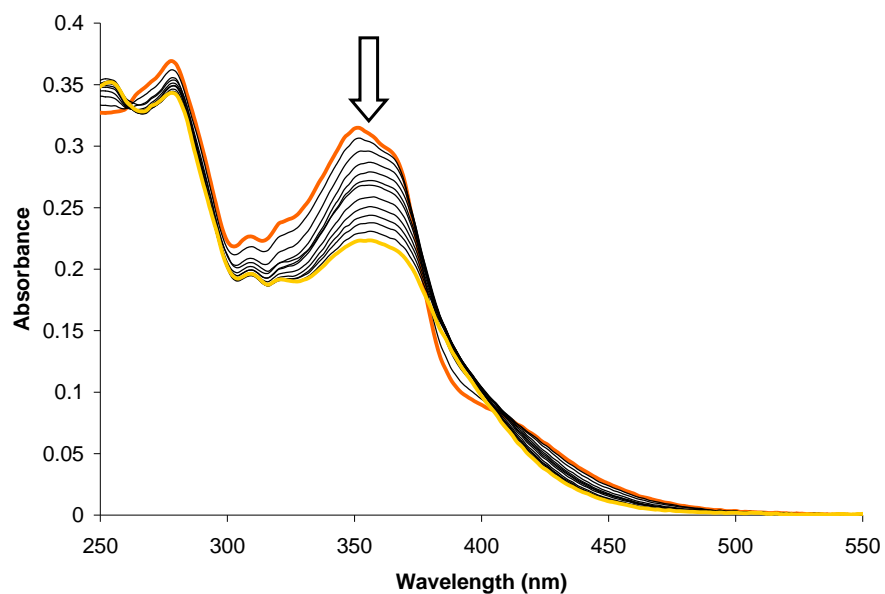

**Figure S17:** UV-Vis titration of compound **4** ( $1 \times 10^{-5}$  M) with aliquots of TBAF ( $3 \times 10^{-3}$  M) in DCM at 298 K.

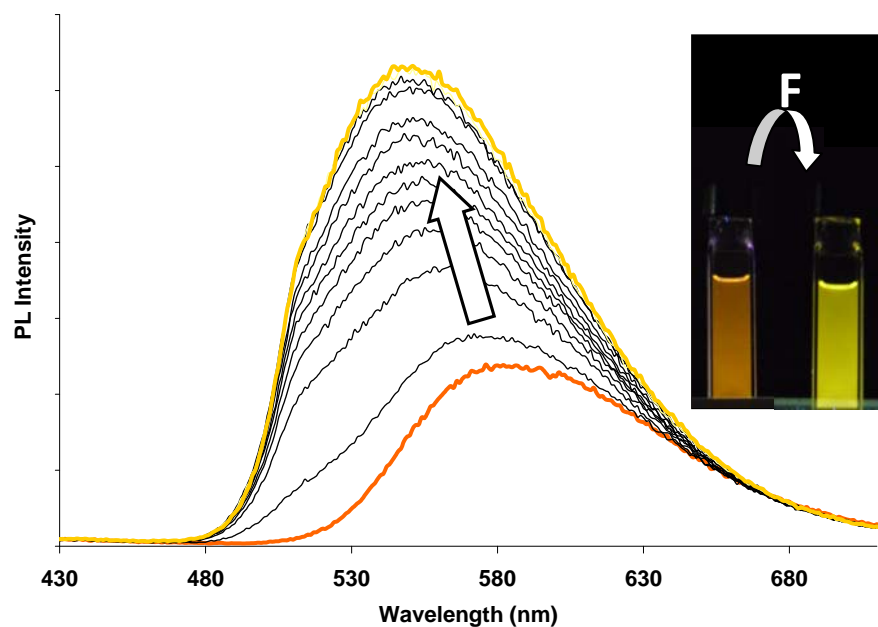

**Figure S18:** Phosphorescence titration of compound **4** ( $1 \times 10^{-5}$  M) with aliquots of TBAF ( $3 \times 10^{-3}$  M) in DCM at 298 K ( $\lambda_{\text{ex}} = 350$  nm).

**Table S2:** Photophysical properties of compounds **1**, **3** and **4**.

| Compound                              | Absorbance data, 298 K                                                          | Emission data, 298 K [solid-state] |                             |                                         |                       |
|---------------------------------------|---------------------------------------------------------------------------------|------------------------------------|-----------------------------|-----------------------------------------|-----------------------|
|                                       | $\lambda_{\text{max}}$ (nm), $\epsilon$ ( $10^4 \text{ cm}^{-1}\text{M}^{-1}$ ) | $\lambda_{\text{ex}}$ (nm)         | $\lambda_{\text{max}}$ (nm) | $\tau$ ( $\mu\text{s}$ ) <sup>[e]</sup> | $\Phi$ <sup>[e]</sup> |
| <b>1</b> <sup>[a]</sup>               | 266,1.42 / 358,3.75                                                             | 358                                | 420 [516] <sup>c</sup>      | -                                       | <0.01                 |
| <b>3</b> <sup>[b]</sup>               | 262,2.96 / 279, 2.75 / 318,1.99 / 350,2.48                                      | 350                                | 565 [545] <sup>d</sup>      | 1.4                                     | 0.03 [0.16]           |
| <b>3·F<sup>-</sup></b> <sup>[b]</sup> | 257,3.00 / 282,2.25 / 316,1.61 / 352,1.70                                       | 352                                | 536                         | 4                                       | 0.15                  |
| <b>4</b> <sup>[b]</sup>               | 278,3.69 / 308,2.26 / 320,2.36 / 350,3.14                                       | 350                                | 587 [565] <sup>d</sup>      | 1.1                                     | 0.04 [0.11]           |
| <b>4·F<sup>-</sup></b> <sup>[b]</sup> | 288,3.43 / 308,1.95 / 320,1.91 / 355, 2.23                                      | 355                                | 550                         | 5.46                                    | 0.24                  |

<sup>[a]</sup> Measurements performed in 2-methyltetrahydrofuran, 9,10-diphenylanthracene was used as the QY reference (0.90).

<sup>[b]</sup> Measurements were performed in CH<sub>2</sub>Cl<sub>2</sub>, IrPPy<sub>3</sub> was used as the QY reference compound (0.98).

<sup>[c]</sup> Measured in a frozen glass of 2-methyltetrahydrofuran (77 K).

<sup>[d]</sup> Polymer film was comprised of 5% **3** or **4** in PMMA, and spin coated using THF as the solvent.

<sup>[e]</sup> Analyses were performed with samples in solution (either 2-MeTHF or DCM as noted); value for **1** corresponds to fluorescence quantum yield, while the values for **3** and **4** correspond to phosphorescent quantum yield.

### **S11. Computational Results of Compounds 3 and 4**

The computational calculations were performed using Gaussian09, revision B.01<sup>[1]</sup> software package and the High Performance Computing Virtual Laboratory (HPCVL) at Queen's University. The ground-state geometries were fully optimized at the B3LYP<sup>[2]</sup> level using LANL2DZ basis set for platinum and 6-31G(d) basis set for all other atoms.<sup>[3]</sup> The initial geometric parameters in the calculations were employed from crystal structure data for geometry optimization. Time-dependent density function theory (TD-DFT) calculations were performed to obtain the vertical singlet and triplet excitation energies.

### **References**

- [1] M. J. Frisch, G. W. Trucks, H. B. Schlegel, G. E. Scuseria, M. A. Robb, J. R. Cheeseman, G. Scalmani, V. Barone, B. Mennucci, G. A. Petersson, H. Nakatsuji, M. Caricato, X. Li, H. P. Hratchian, A. F. Izmaylov, J. Bloino, G. Zheng, J. L. Sonnenberg, M. Hada, M. Ehara, K. Toyota, R. Fukuda, J. Hasegawa, M. Ishida, T. Nakajima, Y. Honda, O. Kitao, H. Nakai, T. Vreven, J. A. Montgomery, Jr., J. E. Peralta, F. Ogliaro, M. Bearpark, J. J. Heyd, E. Brothers, K. N. Kudin, V. N. Staroverov, T. Keith, R. Kobayashi, J. Normand, K. Raghavachari, A. Rendell, J. C. Burant, S. S. Iyengar, J. Tomasi, M. Cossi, N. Rega, J. M. Millam, M. Klene, J. E. Knox, J. B. Cross, V. Bakken, C. Adamo, J. Jaramillo, R. Gomperts, R. E. Stratmann, O. Yazyev, A. J. Austin, R. Cammi, C. Pomelli, J. W. Ochterski, R. L. Martin, K. Morokuma, V. G. Zakrzewski, G. A. Voth, P. Salvador, J. J. Dannenberg, S. Dapprich, A. D. Daniels, O. Farkas, J. B. Foresman, J. V. Ortiz, J. Cioslowski, and D. J. Fox, Gaussian, Inc., Wallingford CT, 2010.
- [2] (a) A. D. Becke, *J. Chem. Phys.* **1993**, *98*, 5648; (b) C. Lee, C. W. Yang, R. G. Parr, *Phys. Rev. B* **1988**, *37*, 785.
- [3] P. J. Hay, *J. Phys. Chem. A* **2002**, *106*, 1634.

**DFT Calculation Results for 3 / 3F<sup>-</sup> in Ground States:** Isodensity contour = 0.02 a.u.

|        | 3                                                                                                                    | 3 + (NMe <sub>4</sub> <sup>+</sup> )F <sup>-</sup>                                                                    |
|--------|----------------------------------------------------------------------------------------------------------------------|-----------------------------------------------------------------------------------------------------------------------|
| LUMO+2 | 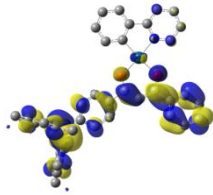<br>-1.25 eV [B p orbital = 20%]    | <br>-0.81 eV                        |
| LUMO+1 | <br>-1.63 eV                        | <br>-1.21 eV                        |
| LUMO   | <br>-2.03 eV [B p orbital = 20%]   | <br>-1.44 eV                       |
| HOMO   | <br>-5.48 eV [Pt d orbital = 31%] | <br>-4.85 eV                      |
| HOMO-1 | <br>-5.78 eV [Pt d orbital = 29%] | <br>-5.10 eV [Pt d orbital = 16%] |

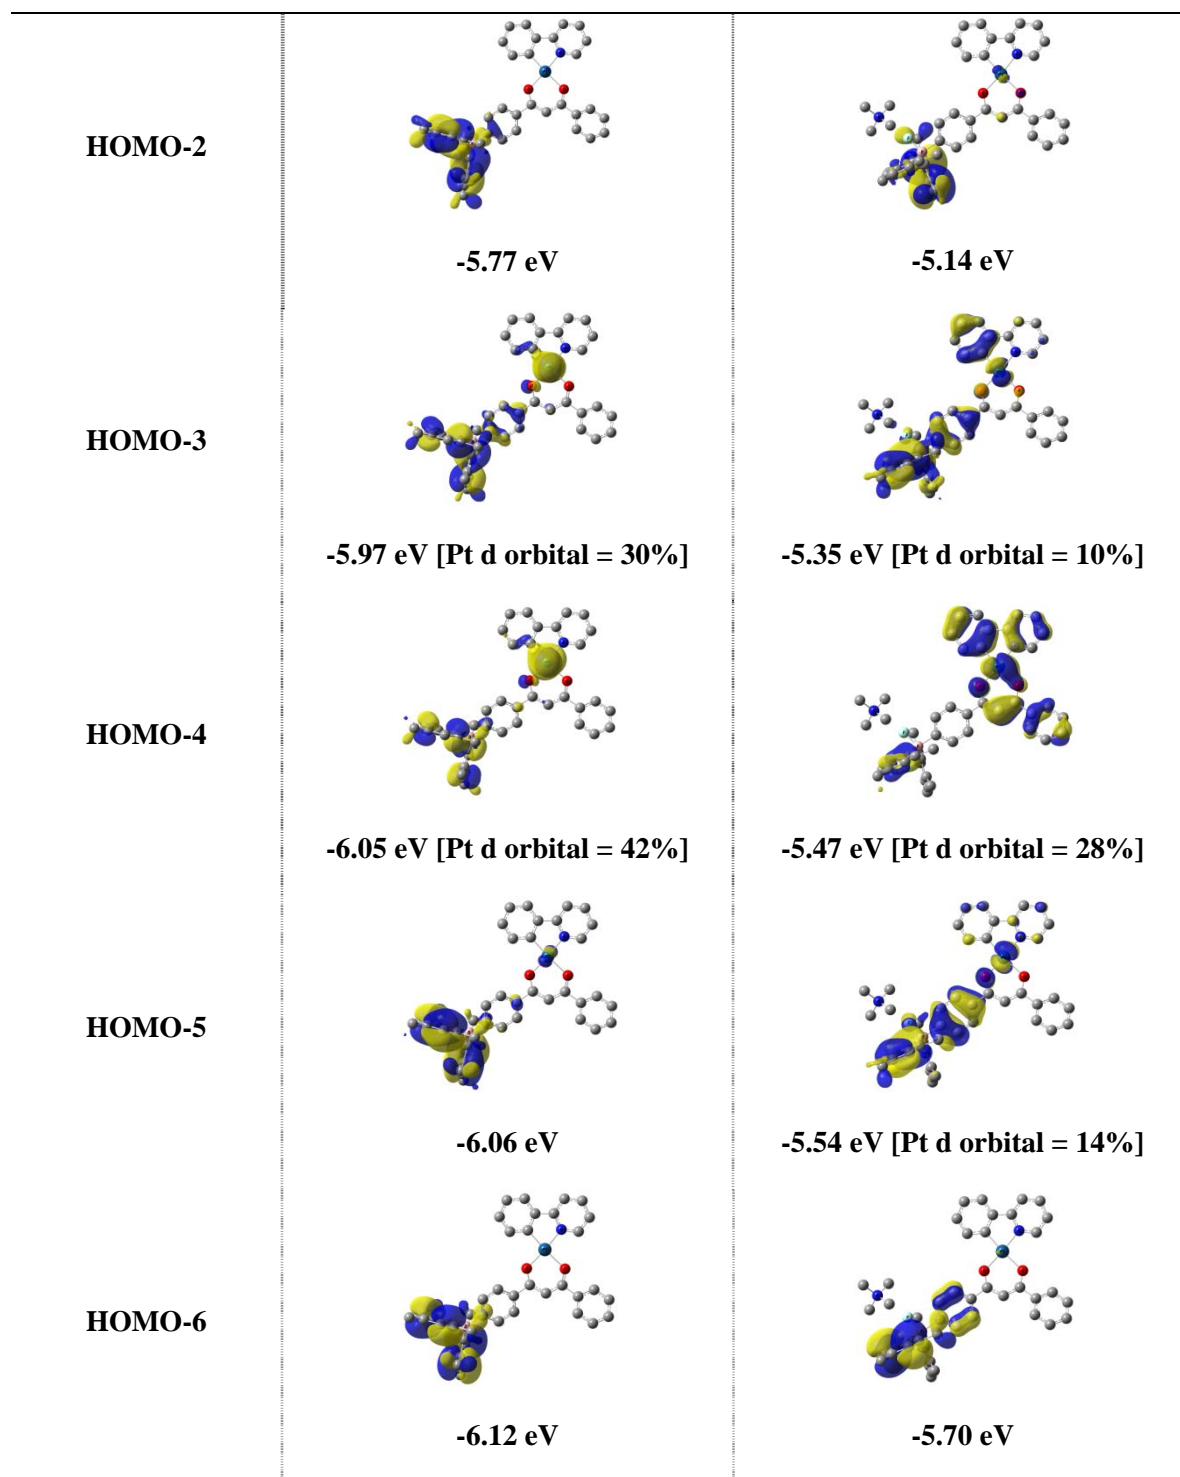

**TD-DFT Calculation Results:** The calculated electronic transition configurations, excitation energy and oscillator strengths for the transitions of **3** and **3F<sup>-</sup>**.

| Complex         | Spin state            | Transition configurations | Excitation energy<br>(nm, eV) | Oscillator strength |
|-----------------|-----------------------|---------------------------|-------------------------------|---------------------|
| <b>3</b>        | S <sub>1</sub>        | HOMO → LUMO (97%)         | 421.6 (2.94)                  | 0.0651              |
|                 | S <sub>2</sub>        | HOMO-1 → LUMO (5%)        | 396.7 (3.13)                  | 0.0564              |
|                 |                       | HOMO-1 → LUMO+1 (11%)     |                               |                     |
|                 | S <sub>3</sub>        | HOMO → LUMO+1 (82%)       | 376.3 (3.29)                  | 0.1431              |
|                 |                       | HOMO-4 → LUMO (6%)        |                               |                     |
|                 |                       | HOMO-3 → LUMO (8%)        |                               |                     |
|                 |                       | HOMO-2 → LUMO (6%)        |                               |                     |
|                 |                       | HOMO-1 → LUMO (71%)       |                               |                     |
|                 | S <sub>4</sub>        | HOMO → LUMO+1 (5%)        | 374.5 (3.31)                  | 0.0399              |
|                 |                       | HOMO-4 → LUMO (10%)       |                               |                     |
|                 |                       | HOMO-3 → LUMO (8%)        |                               |                     |
|                 |                       | HOMO-2 → LUMO (75%)       |                               |                     |
|                 | S <sub>5</sub>        | HOMO-2 → LUMO+2 (4%)      | 372.4 (3.33)                  | 0.0272              |
|                 |                       | HOMO-4 → LUMO (33%)       |                               |                     |
|                 |                       | HOMO-4 → LUMO+2 (2%)      |                               |                     |
|                 |                       | HOMO-3 → LUMO (28%)       |                               |                     |
| S <sub>6</sub>  | HOMO-2 → LUMO (12%)   | 362.0 (3.43)              | 0.2261                        |                     |
|                 | HOMO-1 → LUMO (18%)   |                           |                               |                     |
|                 | HOMO-4 → LUMO (41%)   |                           |                               |                     |
| S <sub>7</sub>  | HOMO-3 → LUMO (49%)   | 352.1 (3.52)              | 0.0430                        |                     |
|                 | HOMO-3 → LUMO+2 (2%)  |                           |                               |                     |
|                 | HOMO-1 → LUMO+1 (4%)  |                           |                               |                     |
|                 | HOMO-5 → LUMO (19%)   |                           |                               |                     |
| S <sub>8</sub>  | HOMO-4 → LUMO+1 (34%) | 351.7 (3.53)              | 0.0820                        |                     |
|                 | HOMO-3 → LUMO+1 (28%) |                           |                               |                     |
|                 | HOMO-1 → LUMO+1 (13%) |                           |                               |                     |
|                 | HOMO-5 → LUMO (50%)   |                           |                               |                     |
| S <sub>9</sub>  | HOMO-5 → LUMO+2 (2%)  | 348.8 (3.55)              | 0.0158                        |                     |
|                 | HOMO-4 → LUMO+1 (22%) |                           |                               |                     |
|                 | HOMO-3 → LUMO+1 (12%) |                           |                               |                     |
| S <sub>10</sub> | HOMO-1 → LUMO+1 (9%)  | 346.5 (3.58)              | 0.0062                        |                     |
|                 | HOMO-5 → LUMO (25%)   |                           |                               |                     |
| T <sub>1</sub>  | HOMO-1 → LUMO+1 (56%) | 513.4 (2.42)              | 0.0000                        |                     |
|                 | HOMO → LUMO+1 (6%)    |                           |                               |                     |
|                 | HOMO-6 → LUMO (94%)   |                           |                               |                     |
|                 | HOMO-6 → LUMO+2 (4%)  |                           |                               |                     |
|                 | HOMO-8 → LUMO (2%)    |                           |                               |                     |
| T <sub>2</sub>  | HOMO-7 → LUMO (2%)    | 466.7 (2.66)              | 0.0000                        |                     |
|                 | HOMO-1 → LUMO (31%)   |                           |                               |                     |
|                 | HOMO-1 → LUMO+2 (6%)  |                           |                               |                     |
|                 | HOMO → LUMO (47%)     |                           |                               |                     |
| T <sub>3</sub>  | HOMO → LUMO+2 (6%)    | 427.5 (2.90)              | 0.0000                        |                     |
|                 | HOMO-7 → LUMO+1 (7%)  |                           |                               |                     |
|                 | HOMO-1 → LUMO+1 (23%) |                           |                               |                     |
|                 | HOMO → LUMO+1 (56%)   |                           |                               |                     |
|                 | HOMO-8 → LUMO (7%)    |                           |                               |                     |
| T <sub>3</sub>  | HOMO-3 → LUMO (5%)    | 427.5 (2.90)              | 0.0000                        |                     |
|                 | HOMO-1 → LUMO (34%)   |                           |                               |                     |
|                 | HOMO-1 → LUMO+1 (4%)  |                           |                               |                     |
|                 | HOMO-1 → LUMO+2 (8%)  |                           |                               |                     |
|                 | HOMO → LUMO (24%)     |                           |                               |                     |

| Complex               | Spin state                       | Transition configurations                                                                                                                                            | Excitation energy<br>(nm, eV) | Oscillator strength |
|-----------------------|----------------------------------|----------------------------------------------------------------------------------------------------------------------------------------------------------------------|-------------------------------|---------------------|
| <b>3F<sup>-</sup></b> | S <sub>1</sub>                   | HOMO-4 → LUMO (14%)<br>HOMO-3 → LUMO (7%)<br>HOMO-2 → LUMO (2%)<br>HOMO-1 → LUMO (58%)<br>HOMO → LUMO (15%)                                                          | 409.6 (3.03)                  | 0.0227              |
|                       | S <sub>2</sub>                   | HOMO-4 → LUMO (3%)<br>HOMO-1 → LUMO (7%)<br>HOMO → LUMO (76%)<br>HOMO → LUMO+1 (11%)                                                                                 | 391.8 (3.16)                  | 0.0366              |
|                       | S <sub>3</sub>                   | HOMO-1 → LUMO (3%)<br>HOMO-1 → LUMO+1 (6%)<br>HOMO → LUMO (8%)<br>HOMO → LUMO+1 (81%)                                                                                | 380.0 (3.26)                  | 0.0858              |
|                       | S <sub>4</sub>                   | HOMO-5 → LUMO (5%)<br>HOMO-4 → LUMO (37%)<br>HOMO-3 → LUMO+1 (4%)<br>HOMO-1 → LUMO (15%)<br>HOMO-1 → LUMO+1 (31%)<br>HOMO → LUMO+1 (4%)                              | 373.6 (3.32)                  | 0.0434              |
|                       | S <sub>5</sub>                   | HOMO-5 → LUMO (3%)<br>HOMO-4 → LUMO (32%)<br>HOMO-1 → LUMO (5%)<br>HOMO-1 → LUMO+1 (50%)<br>HOMO → LUMO+1 (3%)                                                       | 366.0 (3.39)                  | 0.1728              |
|                       | S <sub>6</sub>                   | HOMO-7 → LUMO (93%)                                                                                                                                                  | 362.6 (3.42)                  | 0.0031              |
|                       | S <sub>7</sub>                   | HOMO-2 → LUMO (91%)<br>HOMO-2 → LUMO+1 (4%)<br>HOMO-1 → LUMO (4%)                                                                                                    | 358.7 (3.46)                  | 0.0036              |
|                       | S <sub>8</sub>                   | HOMO-7 → LUMO (2%)<br>HOMO-5 → LUMO (17%)<br>HOMO-3 → LUMO (64%)<br>HOMO-1 → LUMO (6%)                                                                               | 350.2 (3.54)                  | 0.1449              |
|                       | S <sub>9</sub>                   | HOMO-2 → LUMO (4%)<br>HOMO-2 → LUMO+1 (91%)<br>HOMO-1 → LUMO+1 (3%)                                                                                                  | 345.8 (3.59)                  | 0.0015              |
|                       | S <sub>10</sub>                  | HOMO-7 → LUMO+1 (3%)<br>HOMO-4 → LUMO+2 (2%)<br>HOMO-3 → LUMO+1 (3%)<br>HOMO-3 → LUMO+2 (8%)<br>HOMO-2 → LUMO+2 (2%)<br>HOMO-1 → LUMO+2 (62%)<br>HOMO → LUMO+2 (13%) | 339.2 (3.66)                  | 0.0232              |
|                       | T <sub>1</sub> (T <sub>A</sub> ) | HOMO-4 → LUMO+1 (17%)<br>HOMO-1 → LUMO (9%)<br>HOMO-1 → LUMO+1 (55%)<br>HOMO → LUMO+1 (6%)                                                                           | 486.6 (2.55)                  | 0.0000              |
|                       | T <sub>2</sub> (T <sub>C</sub> ) | HOMO-9 → LUMO (7%)<br>HOMO-4 → LUMO (35%)<br>HOMO-3 → LUMO (11%)<br>HOMO-1 → LUMO (29%)<br>HOMO-1 → LUMO+1 (5%)                                                      | 470.7 (2.63)                  | 0.0000              |
|                       | T <sub>3</sub>                   | HOMO-9 → LUMO (8%)<br>HOMO-9 → LUMO+2 (3%)<br>HOMO-5 → LUMO (15%)<br>HOMO-4 → LUMO (20%)<br>HOMO-4 → LUMO+1 (4%)<br>HOMO-3 → LUMO (7%)<br>HOMO-1 → LUMO (27%)        | 427.8 (2.90)                  | 0.0000              |



**DFT Calculation Results for 4 / 4F<sup>-</sup> in Ground States:** Isodensity contour = 0.02 a.u.

|        | 4                                                                                                                        | 4 + (NMe <sub>4</sub> <sup>+</sup> )F <sup>-</sup>                                                                        |
|--------|--------------------------------------------------------------------------------------------------------------------------|---------------------------------------------------------------------------------------------------------------------------|
| LUMO+2 | 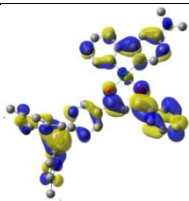 <p>-1.11 eV [B p orbital = 16%]</p>    |  <p>-0.37 eV</p>                        |
| LUMO+1 |  <p>-1.14 eV</p>                        |  <p>-0.96 eV</p>                        |
| LUMO   |  <p>-1.89 eV [B p orbital = 23%]</p>   |  <p>-1.05 eV</p>                       |
| HOMO   |  <p>-5.22 eV [Pt d orbital = 33%]</p> |  <p>-4.62 eV [Pt d orbital = 28%]</p> |
| HOMO-1 |  <p>-5.43 eV [Pt d orbital = 39%]</p> |  <p>-4.88 eV</p>                      |

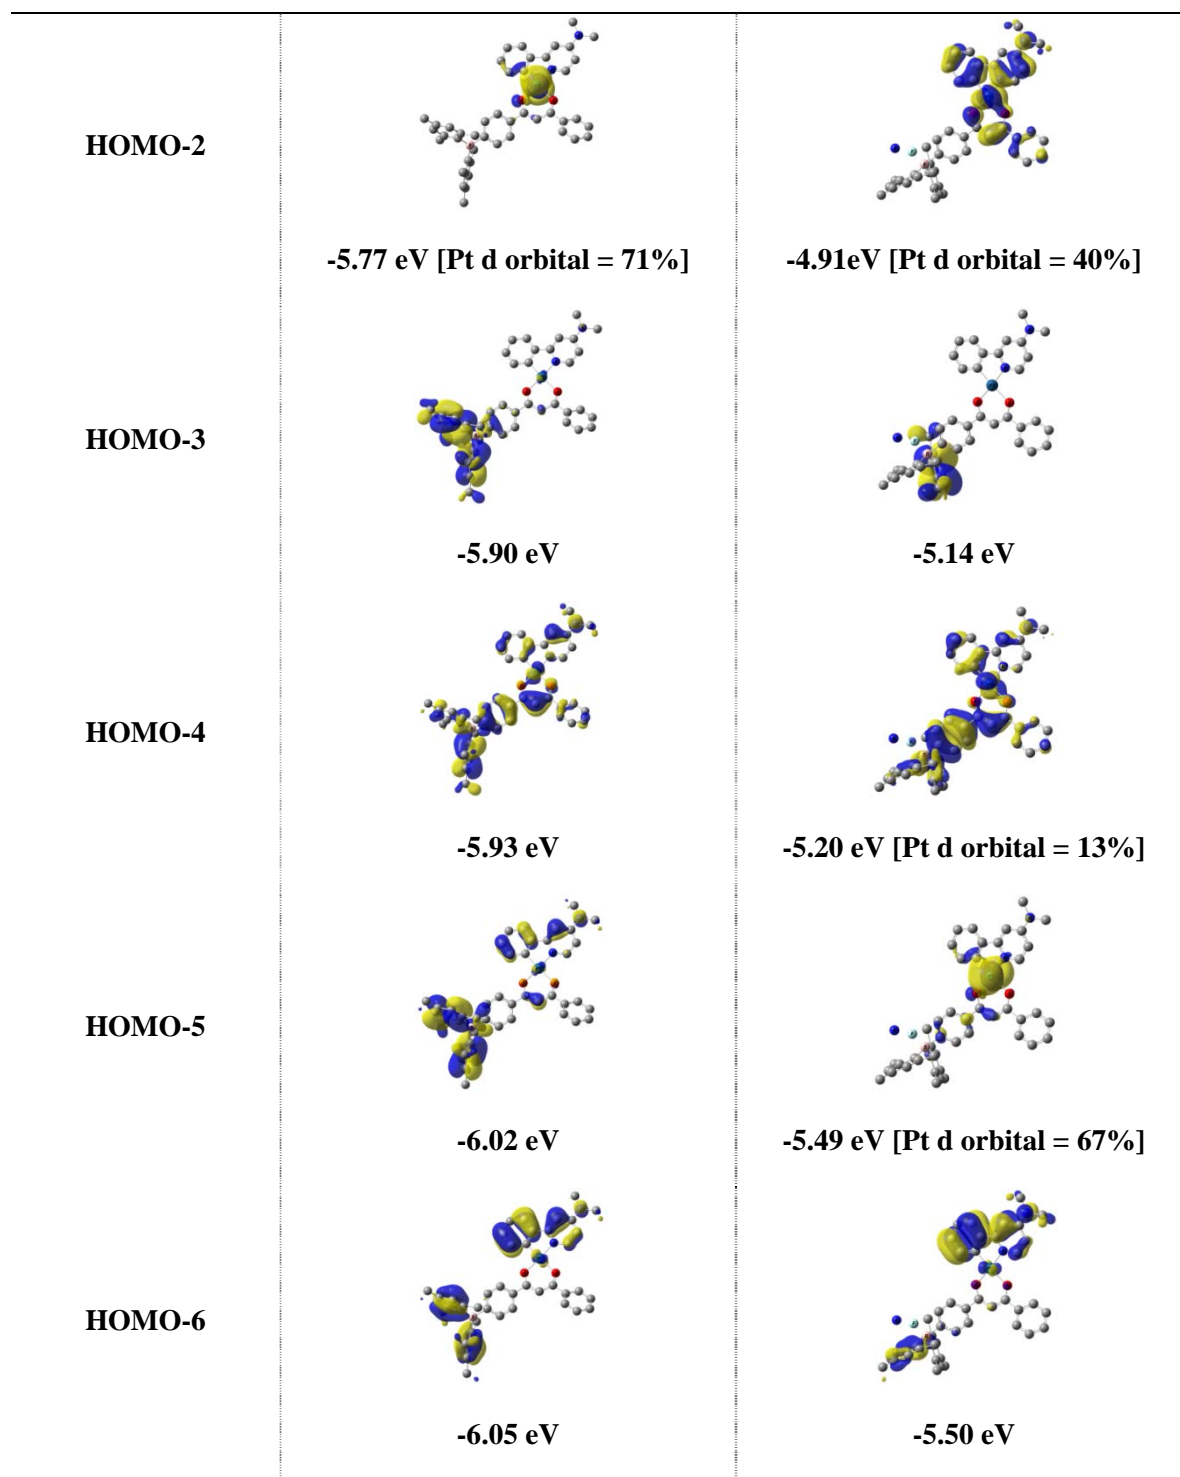

**TD-DFT Calculation Results:** The calculated electronic transition configurations, excitation energy and oscillator strengths for the transitions of **4** and **4F<sup>-</sup>**.

| Complex              | Spin state            | Transition configurations | Excitation energy<br>(nm, eV) | Oscillator strength |
|----------------------|-----------------------|---------------------------|-------------------------------|---------------------|
| <b>4</b>             | S <sub>1</sub>        | HOMO → LUMO (96%)         | 439.0 (2.82)                  | 0.0490              |
|                      | S <sub>2</sub>        | HOMO-1 → LUMO (95%)       | 400.5 (3.10)                  | 0.1074              |
|                      | S <sub>3</sub>        | HOMO-2 → LUMO (91%)       | 389.0 (3.19)                  | 0.0035              |
|                      |                       | HOMO-2 → LUMO (5%)        |                               |                     |
|                      | S <sub>4</sub>        | HOMO-4 → LUMO (3%)        | 370.0 (3.35)                  | 0.0653              |
|                      |                       | HOMO-3 → LUMO (91%)       |                               |                     |
|                      |                       | HOMO-3 → LUMO+2 (4%)      |                               |                     |
|                      | S <sub>5</sub>        | HOMO-4 → LUMO (7%)        | 364.2 (3.40)                  | 0.1924              |
|                      |                       | HOMO-1 → LUMO+1 (11%)     |                               |                     |
|                      |                       | HOMO-1 → LUMO+2 (2%)      |                               |                     |
|                      |                       | HOMO → LUMO+1 (65%)       |                               |                     |
|                      | S <sub>6</sub>        | HOMO → LUMO+2 (10%)       | 359.3 (3.45)                  | 0.2382              |
|                      |                       | HOMO-5 → LUMO (12%)       |                               |                     |
|                      |                       | HOMO-4 → LUMO (69%)       |                               |                     |
|                      |                       | HOMO-1 → LUMO+1 (2%)      |                               |                     |
|                      | S <sub>7</sub>        | HOMO → LUMO+1 (5%)        | 348.1 (3.56)                  | 0.1195              |
|                      |                       | HOMO-6 → LUMO (24%)       |                               |                     |
|                      |                       | HOMO-5 → LUMO (62%)       |                               |                     |
|                      | S <sub>8</sub>        | HOMO-4 → LUMO (4%)        | 341.2 (3.63)                  | 0.0008              |
| HOMO-7 → LUMO (17%)  |                       |                           |                               |                     |
| HOMO-6 → LUMO (3%)   |                       |                           |                               |                     |
| HOMO-1 → LUMO+2 (2%) |                       |                           |                               |                     |
| S <sub>9</sub>       | HOMO → LUMO+1 (8%)    | 340.6 (3.64)              | 0.0041                        |                     |
|                      | HOMO → LUMO+2 (66%)   |                           |                               |                     |
|                      | HOMO-8 → LUMO (33%)   |                           |                               |                     |
|                      | HOMO-7 → LUMO (44%)   |                           |                               |                     |
| S <sub>10</sub>      | HOMO-1 → LUMO+1 (5%)  | 340.4 (3.64)              | 0.0801                        |                     |
|                      | HOMO → LUMO+2 (9%)    |                           |                               |                     |
|                      | HOMO-1 → LUMO+1 (60%) |                           |                               |                     |
|                      | HOMO-7 → LUMO (2%)    |                           |                               |                     |
| T <sub>1</sub>       | HOMO-8 → LUMO (5%)    | 527.0 (2.35)              | 0.0000                        |                     |
|                      | HOMO-7 → LUMO (2%)    |                           |                               |                     |
|                      | HOMO-1 → LUMO+1 (19%) |                           |                               |                     |
|                      | HOMO-1 → LUMO+2 (3%)  |                           |                               |                     |
|                      | HOMO → LUMO (52%)     |                           |                               |                     |
| T <sub>2</sub>       | HOMO → LUMO+2 (6%)    | 444.8 (2.79)              | 0.0000                        |                     |
|                      | HOMO → LUMO (22%)     |                           |                               |                     |
|                      | HOMO-9 → LUMO (4%)    |                           |                               |                     |
|                      | HOMO-4 → LUMO (3%)    |                           |                               |                     |
| T <sub>3</sub>       | HOMO-1 → LUMO (55%)   | 435.4 (2.85)              | 0.0000                        |                     |
|                      | HOMO-1 → LUMO+2 (4%)  |                           |                               |                     |
|                      | HOMO-6 → LUMO+1 (6%)  |                           |                               |                     |
|                      | HOMO-1 → LUMO+1 (26%) |                           |                               |                     |
| T <sub>3</sub>       | HOMO → LUMO+1 (37%)   | 435.4 (2.85)              | 0.0000                        |                     |
|                      | HOMO → LUMO+2 (7%)    |                           |                               |                     |

| Complex               | Spin state                       | Transition configurations                                                                                                                                    | Excitation energy<br>(nm, eV)                                                                                                    | Oscillator strength |                                                                                                                                           |              |        |                                                                                                               |              |        |                                                                                               |              |        |
|-----------------------|----------------------------------|--------------------------------------------------------------------------------------------------------------------------------------------------------------|----------------------------------------------------------------------------------------------------------------------------------|---------------------|-------------------------------------------------------------------------------------------------------------------------------------------|--------------|--------|---------------------------------------------------------------------------------------------------------------|--------------|--------|-----------------------------------------------------------------------------------------------|--------------|--------|
| <b>4F<sup>+</sup></b> | S <sub>1</sub>                   | HOMO-1 → LUMO (5%)<br>HOMO → LUMO (92%)                                                                                                                      | 389.6 (3.18)                                                                                                                     | 0.1235              |                                                                                                                                           |              |        |                                                                                                               |              |        |                                                                                               |              |        |
|                       | S <sub>2</sub>                   | HOMO-4 → LUMO+1 (4%)<br>HOMO-3 → LUMO (3%)<br>HOMO-3 → LUMO+1 (3%)<br>HOMO-1 → LUMO (55%)<br>HOMO-1 → LUMO+1 (21%)<br>HOMO → LUMO (6%)<br>HOMO → LUMO+1 (3%) | 379.0 (3.27)                                                                                                                     | 0.0873              |                                                                                                                                           |              |        |                                                                                                               |              |        |                                                                                               |              |        |
|                       |                                  | S <sub>3</sub>                                                                                                                                               |                                                                                                                                  |                     | HOMO-4 → LUMO (3%)<br>HOMO-4 → LUMO+1 (7%)<br>HOMO-3 → LUMO+1 (3%)<br>HOMO-1 → LUMO (31%)<br>HOMO-1 → LUMO+1 (41%)<br>HOMO → LUMO+1 (12%) | 375.5 (3.30) | 0.0176 |                                                                                                               |              |        |                                                                                               |              |        |
|                       |                                  |                                                                                                                                                              |                                                                                                                                  |                     | S <sub>4</sub>                                                                                                                            |              |        | HOMO-4 → LUMO+1 (3%)<br>HOMO-1 → LUMO+1 (12%)<br>HOMO → LUMO+1 (83%)                                          | 361.0 (3.44) | 0.0128 |                                                                                               |              |        |
|                       |                                  |                                                                                                                                                              |                                                                                                                                  |                     |                                                                                                                                           |              |        | S <sub>5</sub>                                                                                                |              |        | HOMO-4 → LUMO+1 (6%)<br>HOMO-3 → LUMO (38%)<br>HOMO-3 → LUMO+1 (39%)<br>HOMO-1 → LUMO+1 (10%) | 355.3 (3.49) | 0.2851 |
|                       |                                  |                                                                                                                                                              |                                                                                                                                  |                     |                                                                                                                                           |              |        |                                                                                                               |              |        | S <sub>6</sub>                                                                                |              |        |
|                       | S <sub>7</sub>                   | HOMO-5 → LUMO (18%)<br>HOMO-4 → LUMO+1 (6%)<br>HOMO-3 → LUMO (41%)<br>HOMO-3 → LUMO+1 (26%)<br>HOMO-1 → LUMO+1 (3%)                                          | 348.1 (3.56)                                                                                                                     | 0.0394              |                                                                                                                                           |              |        |                                                                                                               |              |        |                                                                                               |              |        |
|                       |                                  | S <sub>8</sub>                                                                                                                                               |                                                                                                                                  |                     | HOMO-6 → LUMO (8%)<br>HOMO-5 → LUMO (70%)<br>HOMO-4 → LUMO (3%)<br>HOMO-3 → LUMO (13%)<br>HOMO-3 → LUMO+1 (3%)                            | 343.9 (3.61) | 0.0330 |                                                                                                               |              |        |                                                                                               |              |        |
|                       |                                  |                                                                                                                                                              |                                                                                                                                  |                     | S <sub>9</sub>                                                                                                                            |              |        | HOMO-6 → LUMO+1 (9%)<br>HOMO-5 → LUMO+1 (88%)                                                                 | 337.6 (3.67) | 0.0047 |                                                                                               |              |        |
|                       |                                  |                                                                                                                                                              |                                                                                                                                  |                     |                                                                                                                                           |              |        | S <sub>10</sub>                                                                                               |              |        | HOMO-4 → LUMO (89%)<br>HOMO-3 → LUMO (2%)<br>HOMO-1 → LUMO (4%)                               | 336.7 (3.68) | 0.3570 |
|                       | T <sub>1</sub> (T <sub>A</sub> ) |                                                                                                                                                              | HOMO-10 → LUMO (2%)<br>HOMO-8 → LUMO (2%)<br>HOMO-4 → LUMO (7%)<br>HOMO-3 → LUMO (6%)<br>HOMO-1 → LUMO (67%)<br>HOMO → LUMO (7%) | 491.5 (2.52)        | 0.0000                                                                                                                                    |              |        |                                                                                                               |              |        |                                                                                               |              |        |
|                       |                                  | T <sub>2</sub> (T <sub>C</sub> )                                                                                                                             | HOMO-10 → LUMO+1 (2%)<br>HOMO-9 → LUMO+1 (8%)<br>HOMO-4 → LUMO+1 (29%)<br>HOMO-3 → LUMO+1 (13%)<br>HOMO-1 → LUMO+1 (32%)         |                     |                                                                                                                                           | 440.3 (2.82) | 0.0000 |                                                                                                               |              |        |                                                                                               |              |        |
|                       |                                  |                                                                                                                                                              | T <sub>3</sub>                                                                                                                   |                     |                                                                                                                                           |              |        | HOMO-11 → LUMO (2%)<br>HOMO-4 → LUMO (3%)<br>HOMO-3 → LUMO (47%)<br>HOMO-3 → LUMO+1 (2%)<br>HOMO → LUMO (26%) | 417.1 (2.97) | 0.0000 |                                                                                               |              |        |

Figure S19. Energy level diagram for 3 with and without fluoride ions.

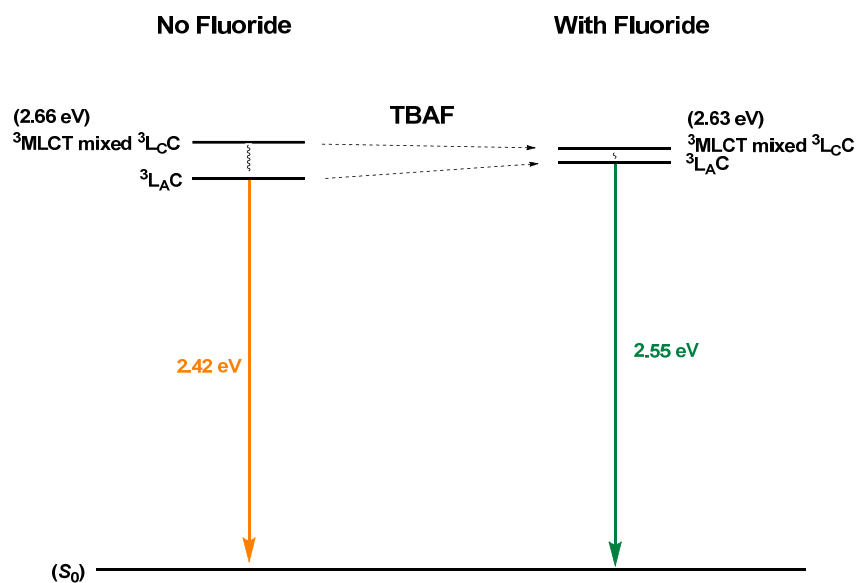

Figure S20. Energy level diagram for 4 with and without fluoride ions.

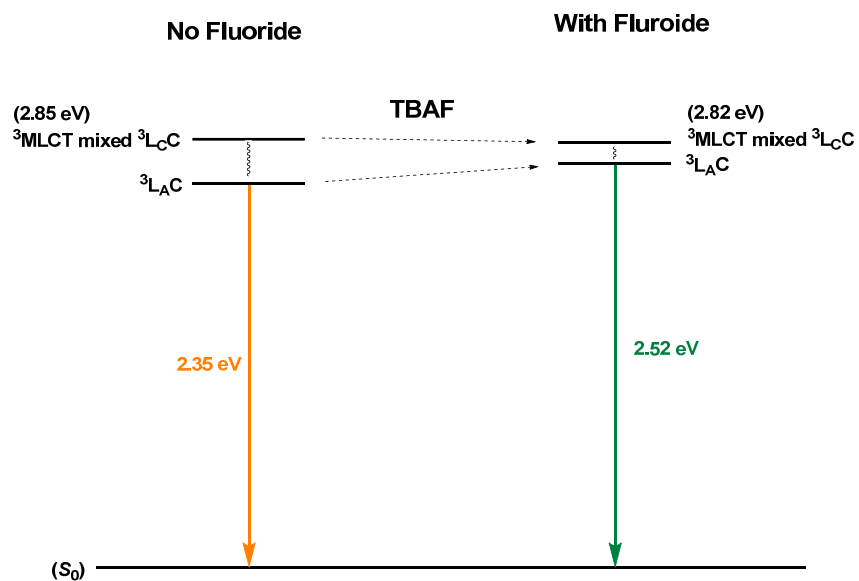

## **S12. X-ray Crystallographic Data**

Table 1. Crystal data and structure refinement for Compd 3.

|                                   |                                                       |                 |
|-----------------------------------|-------------------------------------------------------|-----------------|
| Identification code               | Compd 3                                               |                 |
| Empirical formula                 | C <sub>44</sub> H <sub>40</sub> B N O <sub>2</sub> Pt |                 |
| Formula weight                    | 820.67                                                |                 |
| Temperature                       | 293(2) K                                              |                 |
| Wavelength                        | 0.71073 Å                                             |                 |
| Crystal system                    | Triclinic                                             |                 |
| Space group                       | P-1                                                   |                 |
| Unit cell dimensions              | a = 8.105(2) Å                                        | α = 95.968(2)°. |
|                                   | b = 11.650(3) Å                                       | β = 93.914(3)°. |
|                                   | c = 19.084(5) Å                                       | γ = 97.898(2)°. |
| Volume                            | 1769.0(8) Å <sup>3</sup>                              |                 |
| Z                                 | 2                                                     |                 |
| Density (calculated)              | 1.541 Mg/m <sup>3</sup>                               |                 |
| Absorption coefficient            | 4.005 mm <sup>-1</sup>                                |                 |
| F(000)                            | 820                                                   |                 |
| Crystal size                      | 0.02 x 0.01 x 0.01 mm <sup>3</sup>                    |                 |
| Theta range for data collection   | 1.78 to 26.00°.                                       |                 |
| Index ranges                      | -9 ≤ h ≤ 9, -14 ≤ k ≤ 14, -23 ≤ l ≤ 23                |                 |
| Reflections collected             | 15883                                                 |                 |
| Independent reflections           | 6869 [R(int) = 0.0715]                                |                 |
| Completeness to theta = 26.00°    | 98.9 %                                                |                 |
| Absorption correction             | Semi-empirical from equivalents                       |                 |
| Max. and min. transmission        | 0.9610 and 0.9242                                     |                 |
| Refinement method                 | Full-matrix least-squares on F <sup>2</sup>           |                 |
| Data / restraints / parameters    | 6869 / 0 / 443                                        |                 |
| Goodness-of-fit on F <sup>2</sup> | 1.020                                                 |                 |
| Final R indices [I > 2σ(I)]       | R1 = 0.0567, wR2 = 0.1362                             |                 |
| R indices (all data)              | R1 = 0.0716, wR2 = 0.1451                             |                 |
| Largest diff. peak and hole       | 4.326 and -2.590 e.Å <sup>-3</sup>                    |                 |

Table 2. Atomic coordinates ( $\times 10^4$ ) and equivalent isotropic displacement parameters ( $\text{\AA}^2 \times 10^3$ ) for Compd 3.  $U(\text{eq})$  is defined as one third of the trace of the orthogonalized  $U^{ij}$  tensor.

|       | x         | y        | z        | $U(\text{eq})$ |
|-------|-----------|----------|----------|----------------|
| Pt(1) | -836(1)   | 2258(1)  | 431(1)   | 31(1)          |
| B(1)  | 2315(11)  | 8108(8)  | 3514(5)  | 33(2)          |
| N(1)  | -1753(8)  | 739(6)   | -138(4)  | 39(2)          |
| O(1)  | 591(6)    | 2884(4)  | -341(3)  | 34(1)          |
| O(2)  | 16(7)     | 3713(5)  | 1099(3)  | 38(1)          |
| C(1)  | -2199(9)  | 1544(6)  | 1150(4)  | 26(2)          |
| C(2)  | -2399(10) | 2055(8)  | 1811(5)  | 42(2)          |
| C(3)  | -3373(10) | 1457(8)  | 2277(4)  | 40(2)          |
| C(4)  | -4160(11) | 323(8)   | 2069(5)  | 45(2)          |
| C(5)  | -3975(10) | -218(7)  | 1397(5)  | 39(2)          |
| C(6)  | -3013(10) | 389(7)   | 941(4)   | 34(2)          |
| C(7)  | -2741(9)  | -60(7)   | 202(5)   | 34(2)          |
| C(8)  | -3389(10) | -1162(7) | -135(5)  | 38(2)          |
| C(9)  | -3027(11) | -1467(7) | -822(5)  | 42(2)          |
| C(10) | -2039(11) | -661(8)  | -1167(5) | 43(2)          |
| C(11) | -1433(10) | 422(7)   | -819(4)  | 37(2)          |
| C(12) | 1139(9)   | 4571(6)  | 980(4)   | 29(2)          |
| C(13) | 1950(10)  | 4660(7)  | 358(4)   | 33(2)          |
| C(14) | 1641(9)   | 3849(6)  | -265(4)  | 28(2)          |
| C(15) | 2584(9)   | 4078(6)  | -905(4)  | 30(2)          |
| C(16) | 3404(10)  | 5173(7)  | -1003(4) | 38(2)          |
| C(17) | 4194(11)  | 5323(8)  | -1615(5) | 47(2)          |
| C(18) | 4174(11)  | 4419(8)  | -2141(5) | 44(2)          |
| C(19) | 3331(12)  | 3322(8)  | -2053(5) | 48(2)          |
| C(20) | 2525(9)   | 3162(7)  | -1408(4) | 32(2)          |
| C(21) | 1501(10)  | 5507(7)  | 1601(4)  | 34(2)          |
| C(22) | 2193(9)   | 6680(6)  | 1543(4)  | 31(2)          |
| C(23) | 2437(10)  | 7493(6)  | 2140(4)  | 32(2)          |
| C(24) | 2061(10)  | 7203(7)  | 2815(4)  | 35(2)          |

|       |          |          |         |       |
|-------|----------|----------|---------|-------|
| C(25) | 1392(11) | 6028(7)  | 2846(4) | 42(2) |
| C(26) | 1118(11) | 5216(7)  | 2257(4) | 42(2) |
| C(27) | 2224(10) | 7567(6)  | 4239(4) | 34(2) |
| C(28) | 3319(11) | 6790(7)  | 4451(4) | 38(2) |
| C(29) | 3079(12) | 6200(8)  | 5044(5) | 47(2) |
| C(30) | 1519(16) | 5723(11) | 6118(6) | 79(4) |
| C(31) | 1749(13) | 6365(8)  | 5470(5) | 51(2) |
| C(32) | 714(13)  | 7149(8)  | 5279(5) | 51(2) |
| C(33) | 909(11)  | 7727(7)  | 4686(4) | 43(2) |
| C(34) | -396(12) | 8507(9)  | 4482(6) | 60(3) |
| C(35) | 4842(12) | 6575(8)  | 4050(5) | 47(2) |
| C(36) | 2585(10) | 9468(7)  | 3469(4) | 35(2) |
| C(37) | 1375(11) | 10027(8) | 3122(4) | 41(2) |
| C(38) | 1604(11) | 11251(8) | 3144(5) | 43(2) |
| C(39) | 3033(12) | 11933(7) | 3469(5) | 43(2) |
| C(40) | 4246(11) | 11389(7) | 3798(4) | 38(2) |
| C(41) | 4046(10) | 10184(7) | 3806(4) | 35(2) |
| C(42) | -269(12) | 9361(9)  | 2767(5) | 50(2) |
| C(43) | 5499(10) | 9648(7)  | 4127(4) | 40(2) |
| C(44) | 3273(15) | 13254(8) | 3457(7) | 68(3) |

Table 3. Bond lengths [Å] and angles [°] for Compd 3.

|            |           |            |           |
|------------|-----------|------------|-----------|
| Pt(1)-C(1) | 1.996(7)  | C(1)-C(2)  | 1.368(11) |
| Pt(1)-N(1) | 1.998(7)  | C(1)-C(6)  | 1.419(10) |
| Pt(1)-O(2) | 2.021(5)  | C(2)-C(3)  | 1.404(12) |
| Pt(1)-O(1) | 2.065(5)  | C(2)-H(2A) | 0.9300    |
| B(1)-C(27) | 1.580(12) | C(3)-C(4)  | 1.391(12) |
| B(1)-C(36) | 1.581(12) | C(3)-H(3A) | 0.9300    |
| B(1)-C(24) | 1.595(12) | C(4)-C(5)  | 1.397(12) |
| N(1)-C(11) | 1.365(11) | C(4)-H(4A) | 0.9300    |
| N(1)-C(7)  | 1.386(11) | C(5)-C(6)  | 1.392(11) |
| O(1)-C(14) | 1.303(9)  | C(5)-H(5A) | 0.9300    |
| O(2)-C(12) | 1.306(9)  | C(6)-C(7)  | 1.493(12) |



|              |           |              |           |
|--------------|-----------|--------------|-----------|
| C(7)-C(8)    | 1.391(11) | C(27)-C(28)  | 1.421(12) |
| C(8)-C(9)    | 1.385(12) | C(27)-C(33)  | 1.430(11) |
| C(8)-H(8A)   | 0.9300    | C(28)-C(29)  | 1.395(12) |
| C(9)-C(10)   | 1.397(13) | C(28)-C(35)  | 1.531(12) |
| C(9)-H(9A)   | 0.9300    | C(29)-C(31)  | 1.416(13) |
| C(10)-C(11)  | 1.373(12) | C(29)-H(29A) | 0.9300    |
| C(10)-H(10A) | 0.9300    | C(30)-C(31)  | 1.520(13) |
| C(11)-H(11A) | 0.9300    | C(30)-H(29B) | 0.9600    |
| C(12)-C(13)  | 1.403(11) | C(30)-H(29C) | 0.9600    |
| C(12)-C(21)  | 1.508(11) | C(30)-H(29D) | 0.9600    |
| C(13)-C(14)  | 1.423(11) | C(31)-C(32)  | 1.382(14) |
| C(13)-H(13A) | 0.9300    | C(32)-C(33)  | 1.382(12) |
| C(14)-C(15)  | 1.512(11) | C(32)-H(31A) | 0.9300    |
| C(15)-C(20)  | 1.354(11) | C(33)-C(34)  | 1.541(12) |
| C(15)-C(16)  | 1.393(11) | C(34)-H(33A) | 0.9600    |
| C(16)-C(17)  | 1.385(12) | C(34)-H(33B) | 0.9600    |
| C(16)-H(16A) | 0.9300    | C(34)-H(33C) | 0.9600    |
| C(17)-C(18)  | 1.374(12) | C(35)-H(34A) | 0.9600    |
| C(17)-H(17A) | 0.9300    | C(35)-H(34B) | 0.9600    |
| C(18)-C(19)  | 1.396(12) | C(35)-H(34C) | 0.9600    |
| C(18)-H(18A) | 0.9300    | C(36)-C(37)  | 1.414(12) |
| C(19)-C(20)  | 1.448(11) | C(36)-C(41)  | 1.423(11) |
| C(19)-H(19A) | 0.9300    | C(37)-C(38)  | 1.409(12) |
| C(20)-H(20A) | 0.9300    | C(37)-C(42)  | 1.523(12) |
| C(21)-C(26)  | 1.376(12) | C(38)-C(39)  | 1.380(12) |
| C(21)-C(22)  | 1.423(10) | C(38)-H(38A) | 0.9300    |
| C(22)-C(23)  | 1.388(11) | C(39)-C(40)  | 1.389(12) |
| C(22)-H(22A) | 0.9300    | C(39)-C(44)  | 1.527(12) |
| C(23)-C(24)  | 1.408(11) | C(40)-C(41)  | 1.393(11) |
| C(23)-H(23A) | 0.9300    | C(40)-H(40A) | 0.9300    |
| C(24)-C(25)  | 1.409(10) | C(41)-C(43)  | 1.528(11) |
| C(25)-C(26)  | 1.377(11) | C(42)-H(42A) | 0.9600    |
| C(25)-H(25A) | 0.9300    | C(42)-H(42B) | 0.9600    |
| C(26)-H(26A) | 0.9300    | C(42)-H(42C) | 0.9600    |

|                  |          |                    |          |
|------------------|----------|--------------------|----------|
| C(43)-H(43A)     | 0.9600   | C(6)-C(5)-H(5A)    | 120.3    |
| C(43)-H(43B)     | 0.9600   | C(4)-C(5)-H(5A)    | 120.3    |
| C(43)-H(43C)     | 0.9600   | C(5)-C(6)-C(1)     | 121.1(8) |
| C(44)-H(44A)     | 0.9600   | C(5)-C(6)-C(7)     | 125.6(7) |
| C(44)-H(44B)     | 0.9600   | C(1)-C(6)-C(7)     | 113.3(7) |
| C(44)-H(44C)     | 0.9600   | N(1)-C(7)-C(8)     | 121.3(8) |
|                  |          | N(1)-C(7)-C(6)     | 113.4(7) |
| C(1)-Pt(1)-N(1)  | 81.4(3)  | C(8)-C(7)-C(6)     | 125.3(8) |
| C(1)-Pt(1)-O(2)  | 92.7(3)  | C(9)-C(8)-C(7)     | 119.2(8) |
| N(1)-Pt(1)-O(2)  | 173.9(2) | C(9)-C(8)-H(8A)    | 120.4    |
| C(1)-Pt(1)-O(1)  | 176.1(2) | C(7)-C(8)-H(8A)    | 120.4    |
| N(1)-Pt(1)-O(1)  | 95.2(3)  | C(8)-C(9)-C(10)    | 119.6(8) |
| O(2)-Pt(1)-O(1)  | 90.7(2)  | C(8)-C(9)-H(9A)    | 120.2    |
| C(27)-B(1)-C(36) | 122.8(7) | C(10)-C(9)-H(9A)   | 120.2    |
| C(27)-B(1)-C(24) | 116.3(7) | C(11)-C(10)-C(9)   | 119.5(8) |
| C(36)-B(1)-C(24) | 120.9(7) | C(11)-C(10)-H(10A) | 120.2    |
| C(11)-N(1)-C(7)  | 118.3(7) | C(9)-C(10)-H(10A)  | 120.2    |
| C(11)-N(1)-Pt(1) | 125.2(6) | N(1)-C(11)-C(10)   | 122.1(8) |
| C(7)-N(1)-Pt(1)  | 116.4(6) | N(1)-C(11)-H(11A)  | 119.0    |
| C(14)-O(1)-Pt(1) | 125.5(5) | C(10)-C(11)-H(11A) | 119.0    |
| C(12)-O(2)-Pt(1) | 126.4(5) | O(2)-C(12)-C(13)   | 126.0(7) |
| C(2)-C(1)-C(6)   | 118.3(7) | O(2)-C(12)-C(21)   | 112.2(7) |
| C(2)-C(1)-Pt(1)  | 126.4(6) | C(13)-C(12)-C(21)  | 121.7(7) |
| C(6)-C(1)-Pt(1)  | 115.3(5) | C(12)-C(13)-C(14)  | 125.8(7) |
| C(1)-C(2)-C(3)   | 121.3(8) | C(12)-C(13)-H(13A) | 117.1    |
| C(1)-C(2)-H(2A)  | 119.3    | C(14)-C(13)-H(13A) | 117.1    |
| C(3)-C(2)-H(2A)  | 119.3    | O(1)-C(14)-C(13)   | 125.4(7) |
| C(4)-C(3)-C(2)   | 120.1(8) | O(1)-C(14)-C(15)   | 114.7(6) |
| C(4)-C(3)-H(3A)  | 120.0    | C(13)-C(14)-C(15)  | 119.8(6) |
| C(2)-C(3)-H(3A)  | 120.0    | C(20)-C(15)-C(16)  | 120.5(8) |
| C(3)-C(4)-C(5)   | 119.7(8) | C(20)-C(15)-C(14)  | 116.3(7) |
| C(3)-C(4)-H(4A)  | 120.1    | C(16)-C(15)-C(14)  | 123.1(7) |
| C(5)-C(4)-H(4A)  | 120.1    | C(17)-C(16)-C(15)  | 119.8(8) |
| C(6)-C(5)-C(4)   | 119.5(8) | C(17)-C(16)-H(16A) | 120.1    |

|                    |          |                     |           |
|--------------------|----------|---------------------|-----------|
| C(15)-C(16)-H(16A) | 120.1    | C(29)-C(28)-C(27)   | 121.6(8)  |
| C(18)-C(17)-C(16)  | 121.8(8) | C(29)-C(28)-C(35)   | 116.5(8)  |
| C(18)-C(17)-H(17A) | 119.1    | C(27)-C(28)-C(35)   | 121.8(7)  |
| C(16)-C(17)-H(17A) | 119.1    | C(28)-C(29)-C(31)   | 121.4(9)  |
| C(17)-C(18)-C(19)  | 118.8(8) | C(28)-C(29)-H(29A)  | 119.3     |
| C(17)-C(18)-H(18A) | 120.6    | C(31)-C(29)-H(29A)  | 119.3     |
| C(19)-C(18)-H(18A) | 120.6    | C(31)-C(30)-H(29B)  | 109.5     |
| C(18)-C(19)-C(20)  | 119.4(8) | C(31)-C(30)-H(29C)  | 109.5     |
| C(18)-C(19)-H(19A) | 120.3    | H(29B)-C(30)-H(29C) | 109.5     |
| C(20)-C(19)-H(19A) | 120.3    | C(31)-C(30)-H(29D)  | 109.5     |
| C(15)-C(20)-C(19)  | 119.7(8) | H(29B)-C(30)-H(29D) | 109.5     |
| C(15)-C(20)-H(20A) | 120.2    | H(29C)-C(30)-H(29D) | 109.5     |
| C(19)-C(20)-H(20A) | 120.2    | C(32)-C(31)-C(29)   | 117.1(8)  |
| C(26)-C(21)-C(22)  | 118.2(7) | C(32)-C(31)-C(30)   | 122.2(9)  |
| C(26)-C(21)-C(12)  | 118.3(7) | C(29)-C(31)-C(30)   | 120.6(10) |
| C(22)-C(21)-C(12)  | 123.5(7) | C(31)-C(32)-C(33)   | 122.4(9)  |
| C(23)-C(22)-C(21)  | 119.6(7) | C(31)-C(32)-H(31A)  | 118.8     |
| C(23)-C(22)-H(22A) | 120.2    | C(33)-C(32)-H(31A)  | 118.8     |
| C(21)-C(22)-H(22A) | 120.2    | C(32)-C(33)-C(27)   | 121.9(9)  |
| C(22)-C(23)-C(24)  | 122.7(7) | C(32)-C(33)-C(34)   | 118.5(8)  |
| C(22)-C(23)-H(23A) | 118.7    | C(27)-C(33)-C(34)   | 119.5(8)  |
| C(24)-C(23)-H(23A) | 118.7    | C(33)-C(34)-H(33A)  | 109.5     |
| C(23)-C(24)-C(25)  | 115.5(7) | C(33)-C(34)-H(33B)  | 109.5     |
| C(23)-C(24)-B(1)   | 124.4(7) | H(33A)-C(34)-H(33B) | 109.5     |
| C(25)-C(24)-B(1)   | 120.1(7) | C(33)-C(34)-H(33C)  | 109.5     |
| C(26)-C(25)-C(24)  | 122.5(7) | H(33A)-C(34)-H(33C) | 109.5     |
| C(26)-C(25)-H(25A) | 118.8    | H(33B)-C(34)-H(33C) | 109.5     |
| C(24)-C(25)-H(25A) | 118.8    | C(28)-C(35)-H(34A)  | 109.5     |
| C(21)-C(26)-C(25)  | 121.5(7) | C(28)-C(35)-H(34B)  | 109.5     |
| C(21)-C(26)-H(26A) | 119.3    | H(34A)-C(35)-H(34B) | 109.5     |
| C(25)-C(26)-H(26A) | 119.3    | C(28)-C(35)-H(34C)  | 109.5     |
| C(28)-C(27)-C(33)  | 115.5(7) | H(34A)-C(35)-H(34C) | 109.5     |
| C(28)-C(27)-B(1)   | 122.5(7) | H(34B)-C(35)-H(34C) | 109.5     |
| C(33)-C(27)-B(1)   | 121.6(8) | C(37)-C(36)-C(41)   | 117.4(8)  |

|                     |          |                     |       |
|---------------------|----------|---------------------|-------|
| C(37)-C(36)-B(1)    | 122.0(7) | H(44B)-C(44)-H(44C) | 109.5 |
| C(41)-C(36)-B(1)    | 120.5(7) |                     |       |
| C(38)-C(37)-C(36)   | 120.2(8) |                     |       |
| C(38)-C(37)-C(42)   | 117.3(8) |                     |       |
| C(36)-C(37)-C(42)   | 122.3(8) |                     |       |
| C(39)-C(38)-C(37)   | 121.6(8) |                     |       |
| C(39)-C(38)-H(38A)  | 119.2    |                     |       |
| C(37)-C(38)-H(38A)  | 119.2    |                     |       |
| C(38)-C(39)-C(40)   | 118.6(8) |                     |       |
| C(38)-C(39)-C(44)   | 120.3(9) |                     |       |
| C(40)-C(39)-C(44)   | 121.1(9) |                     |       |
| C(39)-C(40)-C(41)   | 121.6(8) |                     |       |
| C(39)-C(40)-H(40A)  | 119.2    |                     |       |
| C(41)-C(40)-H(40A)  | 119.2    |                     |       |
| C(40)-C(41)-C(36)   | 120.6(8) |                     |       |
| C(40)-C(41)-C(43)   | 118.2(7) |                     |       |
| C(36)-C(41)-C(43)   | 121.0(7) |                     |       |
| C(37)-C(42)-H(42A)  | 109.5    |                     |       |
| C(37)-C(42)-H(42B)  | 109.5    |                     |       |
| H(42A)-C(42)-H(42B) | 109.5    |                     |       |
| C(37)-C(42)-H(42C)  | 109.5    |                     |       |
| H(42A)-C(42)-H(42C) | 109.5    |                     |       |
| H(42B)-C(42)-H(42C) | 109.5    |                     |       |
| C(41)-C(43)-H(43A)  | 109.5    |                     |       |
| C(41)-C(43)-H(43B)  | 109.5    |                     |       |
| H(43A)-C(43)-H(43B) | 109.5    |                     |       |
| C(41)-C(43)-H(43C)  | 109.5    |                     |       |
| H(43A)-C(43)-H(43C) | 109.5    |                     |       |
| H(43B)-C(43)-H(43C) | 109.5    |                     |       |
| C(39)-C(44)-H(44A)  | 109.5    |                     |       |
| C(39)-C(44)-H(44B)  | 109.5    |                     |       |
| H(44A)-C(44)-H(44B) | 109.5    |                     |       |
| C(39)-C(44)-H(44C)  | 109.5    |                     |       |
| H(44A)-C(44)-H(44C) | 109.5    |                     |       |

Table 4. Anisotropic displacement parameters ( $\text{\AA}^2 \times 10^3$ ) for Compd 3. The anisotropic displacement factor exponent takes the form:  $-2\pi^2 [ h^2 a^{*2} U^{11} + \dots + 2 h k a^* b^* U^{12} ]$

|       | $U^{11}$ | $U^{22}$ | $U^{33}$ | $U^{23}$ | $U^{13}$ | $U^{12}$ |
|-------|----------|----------|----------|----------|----------|----------|
| Pt(1) | 31(1)    | 19(1)    | 44(1)    | 10(1)    | 4(1)     | -3(1)    |
| B(1)  | 29(5)    | 28(5)    | 41(5)    | 6(4)     | 6(4)     | -3(4)    |
| N(1)  | 30(4)    | 35(4)    | 55(4)    | 12(3)    | 0(3)     | 10(3)    |
| O(1)  | 32(3)    | 26(3)    | 43(3)    | 6(2)     | -1(2)    | -1(2)    |
| O(2)  | 41(3)    | 28(3)    | 45(3)    | 7(2)     | 3(3)     | 0(3)     |
| C(1)  | 19(3)    | 22(4)    | 37(4)    | 8(3)     | 0(3)     | -2(3)    |
| C(2)  | 32(4)    | 34(5)    | 59(5)    | 11(4)    | 9(4)     | -4(4)    |
| C(3)  | 36(5)    | 43(5)    | 38(4)    | 8(4)     | 7(3)     | -4(4)    |
| C(4)  | 37(5)    | 48(5)    | 51(5)    | 24(4)    | 11(4)    | -6(4)    |
| C(5)  | 36(4)    | 24(4)    | 55(5)    | 15(4)    | 1(4)     | -6(3)    |
| C(6)  | 27(4)    | 26(4)    | 51(5)    | 16(4)    | 0(3)     | 4(3)     |
| C(7)  | 23(4)    | 23(4)    | 58(5)    | 14(4)    | -2(3)    | 2(3)     |
| C(8)  | 39(5)    | 18(4)    | 57(5)    | 13(4)    | 0(4)     | -1(3)    |
| C(9)  | 39(5)    | 26(4)    | 58(5)    | 6(4)     | -5(4)    | -6(4)    |
| C(10) | 42(5)    | 35(5)    | 53(5)    | 1(4)     | 2(4)     | 9(4)     |
| C(11) | 39(5)    | 31(4)    | 43(5)    | 10(4)    | 0(4)     | 6(4)     |
| C(12) | 29(4)    | 13(3)    | 45(4)    | 12(3)    | -6(3)    | 0(3)     |
| C(13) | 29(4)    | 23(4)    | 44(4)    | 9(3)     | 0(3)     | -4(3)    |
| C(14) | 23(4)    | 17(3)    | 45(4)    | 15(3)    | -1(3)    | -1(3)    |
| C(15) | 27(4)    | 16(3)    | 45(4)    | 9(3)     | -2(3)    | -1(3)    |
| C(16) | 35(4)    | 30(4)    | 48(5)    | 7(4)     | 11(4)    | -4(4)    |
| C(17) | 49(5)    | 34(5)    | 55(5)    | 10(4)    | 14(4)    | -11(4)   |
| C(18) | 38(5)    | 42(5)    | 49(5)    | 14(4)    | 10(4)    | -11(4)   |
| C(19) | 57(6)    | 26(4)    | 56(5)    | -2(4)    | 19(4)    | -12(4)   |
| C(20) | 23(4)    | 32(4)    | 42(4)    | -1(3)    | 6(3)     | 12(3)    |
| C(21) | 32(4)    | 20(4)    | 51(5)    | 9(3)     | 4(4)     | 0(3)     |
| C(22) | 25(4)    | 25(4)    | 41(4)    | 12(3)    | 2(3)     | -3(3)    |
| C(23) | 34(4)    | 19(4)    | 44(4)    | 16(3)    | 4(3)     | -4(3)    |

|       |       |       |        |       |       |        |
|-------|-------|-------|--------|-------|-------|--------|
| C(24) | 34(4) | 23(4) | 45(4)  | 8(3)  | 4(3)  | -7(3)  |
| C(25) | 53(5) | 29(4) | 39(4)  | 10(4) | 8(4)  | -16(4) |
| C(26) | 55(6) | 21(4) | 47(5)  | 10(4) | 7(4)  | -14(4) |
| C(27) | 43(5) | 18(4) | 37(4)  | 0(3)  | 4(3)  | -12(3) |
| C(28) | 47(5) | 23(4) | 42(4)  | 6(3)  | 7(4)  | -7(4)  |
| C(29) | 57(6) | 38(5) | 45(5)  | 16(4) | 2(4)  | -10(4) |
| C(30) | 86(9) | 75(8) | 77(8)  | 42(7) | 28(7) | -16(7) |
| C(31) | 67(6) | 38(5) | 46(5)  | 14(4) | 13(5) | -15(5) |
| C(32) | 57(6) | 45(6) | 48(5)  | 3(4)  | 20(4) | -14(5) |
| C(33) | 51(6) | 28(5) | 46(5)  | 7(4)  | 9(4)  | -12(4) |
| C(34) | 52(6) | 61(7) | 75(7)  | 17(6) | 35(5) | 8(5)   |
| C(35) | 62(6) | 29(5) | 52(5)  | 18(4) | 12(4) | 2(4)   |
| C(36) | 36(4) | 32(4) | 36(4)  | 13(3) | 5(3)  | -7(4)  |
| C(37) | 41(5) | 39(5) | 43(5)  | 4(4)  | 10(4) | 0(4)   |
| C(38) | 45(5) | 35(5) | 51(5)  | 5(4)  | 3(4)  | 14(4)  |
| C(39) | 55(6) | 24(4) | 51(5)  | 11(4) | 12(4) | -2(4)  |
| C(40) | 41(5) | 26(4) | 43(4)  | 3(4)  | 6(4)  | -10(4) |
| C(41) | 41(5) | 25(4) | 37(4)  | 7(3)  | 4(3)  | -5(4)  |
| C(42) | 43(5) | 49(6) | 59(6)  | 9(5)  | 0(4)  | 4(4)   |
| C(43) | 41(5) | 27(4) | 50(5)  | 6(4)  | 0(4)  | -7(4)  |
| C(44) | 76(8) | 26(5) | 108(9) | 24(5) | 19(7) | 9(5)   |

Table 5. Hydrogen coordinates ( $\times 10^4$ ) and isotropic displacement parameters ( $\text{\AA}^2 \times 10^3$ ) for Compd 3.

|        | x     | y     | z     | U(eq) |
|--------|-------|-------|-------|-------|
| H(2A)  | -1879 | 2814  | 1955  | 50    |
| H(3A)  | -3491 | 1820  | 2725  | 47    |
| H(4A)  | -4808 | -73   | 2377  | 54    |
| H(5A)  | -4489 | -979  | 1256  | 46    |
| H(8A)  | -4057 | -1687 | 99    | 45    |
| H(9A)  | -3438 | -2205 | -1053 | 51    |
| H(10A) | -1794 | -856  | -1630 | 52    |

|        |       |       |       |     |
|--------|-------|-------|-------|-----|
| H(11A) | -784  | 956   | -1054 | 45  |
| H(13A) | 2761  | 5305  | 351   | 39  |
| H(16A) | 3422  | 5803  | -659  | 46  |
| H(17A) | 4752  | 6055  | -1673 | 56  |
| H(18A) | 4713  | 4536  | -2548 | 53  |
| H(19A) | 3288  | 2700  | -2404 | 57  |
| H(20A) | 1970  | 2433  | -1341 | 38  |
| H(22A) | 2479  | 6901  | 1108  | 37  |
| H(23A) | 2867  | 8261  | 2092  | 39  |
| H(25A) | 1125  | 5794  | 3281  | 50  |
| H(26A) | 663   | 4453  | 2304  | 51  |
| H(29A) | 3809  | 5687  | 5162  | 57  |
| H(29B) | 562   | 5936  | 6342  | 118 |
| H(29C) | 2496  | 5930  | 6444  | 118 |
| H(29D) | 1352  | 4897  | 5978  | 118 |
| H(31A) | -146  | 7294  | 5559  | 62  |
| H(33A) | -1192 | 8523  | 4832  | 91  |
| H(33B) | -962  | 8198  | 4030  | 91  |
| H(33C) | 155   | 9284  | 4458  | 91  |
| H(34A) | 5421  | 6025  | 4272  | 70  |
| H(34B) | 5579  | 7297  | 4059  | 70  |
| H(34C) | 4482  | 6270  | 3569  | 70  |
| H(38A) | 771   | 11609 | 2934  | 52  |
| H(40A) | 5215  | 11841 | 4017  | 46  |
| H(42A) | -913  | 9895  | 2564  | 76  |
| H(42B) | -887  | 8982  | 3111  | 76  |
| H(42C) | -44   | 8786  | 2402  | 76  |
| H(43A) | 6371  | 10258 | 4329  | 60  |
| H(43B) | 5922  | 9160  | 3765  | 60  |
| H(43C) | 5115  | 9188  | 4489  | 60  |
| H(44A) | 2314  | 13471 | 3208  | 102 |
| H(44B) | 4254  | 13488 | 3222  | 102 |
| H(44C) | 3401  | 13633 | 3933  | 102 |

---

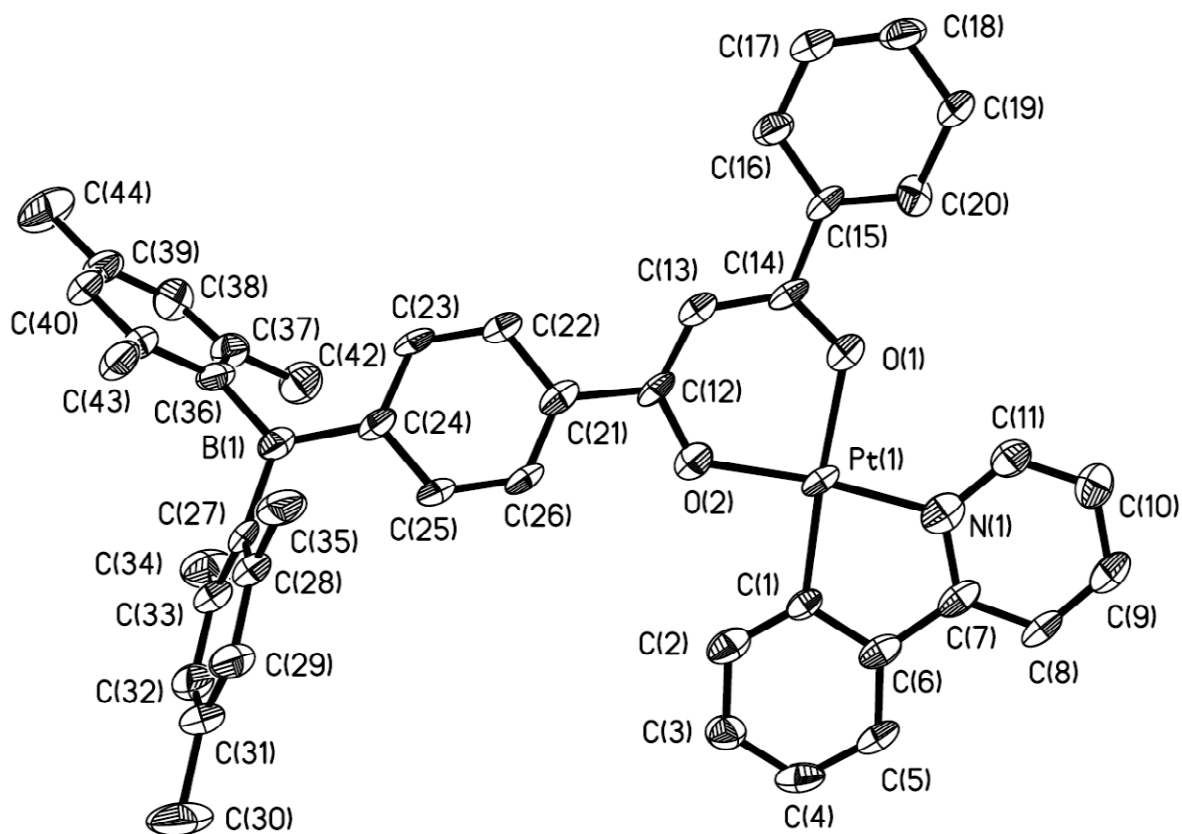

Figure S21. A diagram showing the structure of compound **3** with labeling schemes and 50% thermal ellipsoids. H atoms are omitted for clarity.

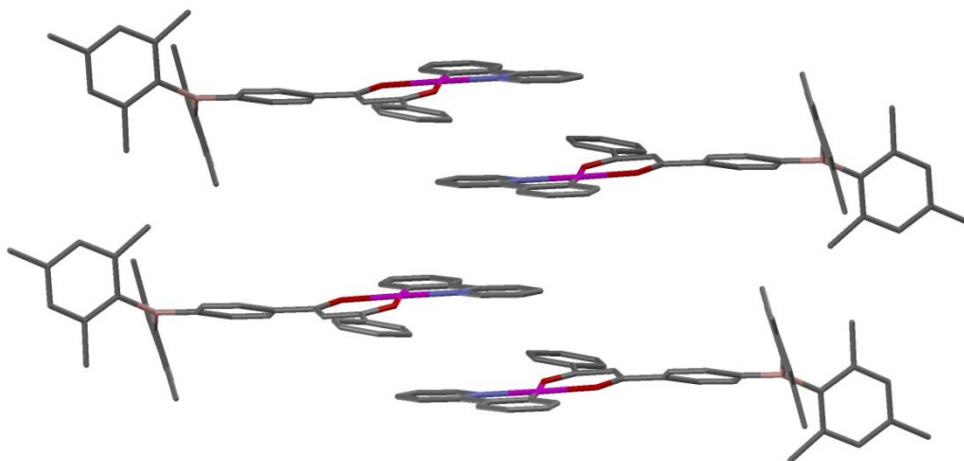

Figure S22. Unit cell packing diagram showing the  $\pi$ -stacking of compound **3**



Table 1. Crystal data and structure refinement for Compd 4.

|                                   |                                                                                              |                    |
|-----------------------------------|----------------------------------------------------------------------------------------------|--------------------|
| Identification code               | Compd 4/2 benzene                                                                            |                    |
| Empirical formula                 | C <sub>58</sub> H <sub>57</sub> B <sub>1</sub> N <sub>2</sub> O <sub>2</sub> Pt <sub>1</sub> |                    |
| Formula weight                    | 1019.96                                                                                      |                    |
| Temperature                       | 180(2) K                                                                                     |                    |
| Wavelength                        | 0.71073 Å                                                                                    |                    |
| Crystal system                    | Monoclinic                                                                                   |                    |
| Space group                       | C2/c                                                                                         |                    |
| Unit cell dimensions              | a = 51.501(4) Å                                                                              | α = 90°.           |
|                                   | b = 8.4801(6) Å                                                                              | β = 118.5670(10)°. |
|                                   | c = 25.3881(18) Å                                                                            | γ = 90°.           |
| Volume                            | 9738.1(12) Å <sup>3</sup>                                                                    |                    |
| Z                                 | 8                                                                                            |                    |
| Density (calculated)              | 1.391 Mg/m <sup>3</sup>                                                                      |                    |
| Absorption coefficient            | 2.926 mm <sup>-1</sup>                                                                       |                    |
| F(000)                            | 4144                                                                                         |                    |
| Crystal size                      | 0.03 x 0.03 x 0.01 mm <sup>3</sup>                                                           |                    |
| Theta range for data collection   | 1.60 to 26.00°.                                                                              |                    |
| Index ranges                      | -63 ≤ h ≤ 63, -10 ≤ k ≤ 10, -31 ≤ l ≤ 31                                                     |                    |
| Reflections collected             | 44074                                                                                        |                    |
| Independent reflections           | 9570 [R(int) = 0.0782]                                                                       |                    |
| Completeness to theta = 26.00°    | 99.8 %                                                                                       |                    |
| Absorption correction             | Semi-empirical from equivalents                                                              |                    |
| Max. and min. transmission        | 0.9713 and 0.9174                                                                            |                    |
| Refinement method                 | Full-matrix least-squares on F <sup>2</sup>                                                  |                    |
| Data / restraints / parameters    | 9570 / 0 / 585                                                                               |                    |
| Goodness-of-fit on F <sup>2</sup> | 1.022                                                                                        |                    |
| Final R indices [I > 2σ(I)]       | R1 = 0.0392, wR2 = 0.0733                                                                    |                    |
| R indices (all data)              | R1 = 0.0710, wR2 = 0.0847                                                                    |                    |
| Largest diff. peak and hole       | 0.751 and -1.451 e.Å <sup>-3</sup>                                                           |                    |

Table 2. Atomic coordinates ( $\times 10^4$ ) and equivalent isotropic displacement parameters ( $\text{\AA}^2 \times 10^3$ ) for Compd 4. U(eq) is defined as one third of the trace of the orthogonalized  $U^{ij}$  tensor.

|       | x       | y        | z        | U(eq) |
|-------|---------|----------|----------|-------|
| Pt(1) | 1980(1) | 2633(1)  | 221(1)   | 28(1) |
| B(1)  | 752(1)  | -3336(7) | 628(3)   | 31(1) |
| O(1)  | 2297(1) | 2152(3)  | 1091(1)  | 22(1) |
| O(2)  | 1678(1) | 1361(4)  | 321(2)   | 31(1) |
| N(1)  | 2259(1) | 3907(4)  | 62(2)    | 29(1) |
| N(2)  | 2800(1) | 6763(5)  | -343(2)  | 43(1) |
| C(1)  | 1714(1) | 3145(6)  | -624(2)  | 33(1) |
| C(2)  | 1422(1) | 2653(6)  | -986(2)  | 42(1) |
| C(3)  | 1265(1) | 3094(7)  | -1580(3) | 48(2) |
| C(4)  | 1390(1) | 4058(7)  | -1839(3) | 49(2) |
| C(5)  | 1676(1) | 4557(6)  | -1500(2) | 42(1) |
| C(6)  | 1840(1) | 4104(5)  | -898(2)  | 31(1) |
| C(7)  | 2147(1) | 4555(5)  | -503(2)  | 31(1) |
| C(8)  | 2325(1) | 5502(6)  | -650(2)  | 35(1) |
| C(9)  | 2623(1) | 5824(6)  | -221(2)  | 35(1) |
| C(10) | 2727(1) | 5105(5)  | 344(2)   | 31(1) |
| C(11) | 2542(1) | 4195(6)  | 460(2)   | 32(1) |
| C(12) | 3107(1) | 7036(6)  | 112(3)   | 50(2) |
| C(13) | 2695(1) | 7552(6)  | -917(3)  | 51(2) |
| C(14) | 1730(1) | 621(6)   | 802(2)   | 31(1) |
| C(15) | 1995(1) | 551(6)   | 1337(2)  | 31(1) |
| C(16) | 2266(1) | 1262(5)  | 1461(2)  | 28(1) |
| C(17) | 2538(1) | 1003(5)  | 2053(2)  | 29(1) |
| C(18) | 2805(1) | 1618(6)  | 2130(2)  | 38(1) |
| C(19) | 3060(1) | 1476(6)  | 2677(2)  | 41(1) |
| C(20) | 3054(1) | 720(6)   | 3151(2)  | 41(1) |
| C(21) | 2790(1) | 78(6)    | 3070(2)  | 38(1) |
| C(22) | 2539(1) | 230(6)   | 2531(2)  | 36(1) |
| C(23) | 1472(1) | -309(5)  | 756(2)   | 28(1) |

|       |         |          |         |        |
|-------|---------|----------|---------|--------|
| C(24) | 1433(1) | -573(6)  | 1256(2) | 35(1)  |
| C(25) | 1197(1) | -1464(6) | 1204(2) | 34(1)  |
| C(26) | 1000(1) | -2200(5) | 664(2)  | 28(1)  |
| C(27) | 1045(1) | -1923(6) | 170(2)  | 34(1)  |
| C(28) | 1272(1) | -967(6)  | 210(2)  | 32(1)  |
| C(29) | 659(1)  | -4772(6) | 179(2)  | 32(1)  |
| C(30) | 362(1)  | -4983(6) | -268(2) | 34(1)  |
| C(31) | 280(1)  | -6318(6) | -633(2) | 38(1)  |
| C(32) | 482(1)  | -7475(6) | -573(2) | 43(1)  |
| C(33) | 775(1)  | -7254(6) | -142(3) | 42(1)  |
| C(34) | 865(1)  | -5937(6) | 220(2)  | 39(1)  |
| C(35) | 134(1)  | -3716(6) | -376(3) | 47(2)  |
| C(36) | 1193(1) | -5820(7) | 677(3)  | 59(2)  |
| C(37) | 387(1)  | -8937(7) | -962(3) | 64(2)  |
| C(38) | 626(1)  | -3049(6) | 1071(2) | 34(1)  |
| C(39) | 635(1)  | -4254(6) | 1470(3) | 39(1)  |
| C(40) | 555(1)  | -3938(7) | 1912(3) | 45(2)  |
| C(41) | 456(1)  | -2484(8) | 1974(3) | 48(2)  |
| C(42) | 443(1)  | -1299(7) | 1583(3) | 48(2)  |
| C(43) | 524(1)  | -1546(6) | 1139(3) | 39(1)  |
| C(44) | 730(1)  | -5925(6) | 1427(3) | 53(2)  |
| C(45) | 366(2)  | -2193(8) | 2451(3) | 74(2)  |
| C(46) | 488(1)  | -193(6)  | 715(3)  | 54(2)  |
| C(47) | 1878(2) | 1991(7)  | 2668(3) | 48(2)  |
| C(48) | 1592(2) | 2515(7)  | 2391(3) | 53(2)  |
| C(49) | 1379(2) | 1673(8)  | 2444(3) | 62(2)  |
| C(50) | 1450(1) | 295(7)   | 2771(3) | 54(2)  |
| C(51) | 1734(1) | -233(7)  | 3050(3) | 46(2)  |
| C(52) | 1948(1) | 621(7)   | 2997(3) | 50(2)  |
| C(53) | 482(3)  | 7776(11) | 7900(5) | 125(4) |
| C(54) | 459(3)  | 6577(13) | 8251(6) | 121(4) |
| C(55) | 702(3)  | 5851(12) | 8684(5) | 118(5) |
| C(56) | 974(3)  | 6333(11) | 8768(4) | 110(4) |
| C(57) | 997(3)  | 7523(11) | 8433(5) | 114(3) |

C(58)

754(3)

8217(11)

8003(5)

125(4)

---

Table 3. Bond lengths [Å] and angles [°] for Compd 4.

|             |          |             |          |
|-------------|----------|-------------|----------|
| Pt(1)-C(1)  | 1.964(5) | C(19)-C(20) | 1.377(7) |
| Pt(1)-N(1)  | 1.987(4) | C(20)-C(21) | 1.383(7) |
| Pt(1)-O(2)  | 2.007(3) | C(21)-C(22) | 1.367(7) |
| Pt(1)-O(1)  | 2.065(3) | C(23)-C(28) | 1.389(6) |
| B(1)-C(38)  | 1.562(8) | C(23)-C(24) | 1.396(7) |
| B(1)-C(26)  | 1.566(7) | C(24)-C(25) | 1.382(6) |
| B(1)-C(29)  | 1.577(7) | C(25)-C(26) | 1.402(6) |
| O(1)-C(16)  | 1.273(5) | C(26)-C(27) | 1.403(7) |
| O(2)-C(14)  | 1.284(6) | C(27)-C(28) | 1.385(6) |
| N(1)-C(11)  | 1.340(6) | C(29)-C(34) | 1.417(7) |
| N(1)-C(7)   | 1.378(6) | C(29)-C(30) | 1.418(7) |
| N(2)-C(9)   | 1.353(6) | C(30)-C(31) | 1.394(7) |
| N(2)-C(13)  | 1.453(7) | C(30)-C(35) | 1.516(7) |
| N(2)-C(12)  | 1.464(7) | C(31)-C(32) | 1.386(7) |
| C(1)-C(2)   | 1.397(7) | C(32)-C(33) | 1.389(7) |
| C(1)-C(6)   | 1.415(7) | C(32)-C(37) | 1.514(7) |
| C(2)-C(3)   | 1.380(7) | C(33)-C(34) | 1.379(7) |
| C(3)-C(4)   | 1.382(8) | C(34)-C(36) | 1.526(7) |
| C(4)-C(5)   | 1.372(7) | C(38)-C(43) | 1.422(7) |
| C(5)-C(6)   | 1.402(7) | C(38)-C(39) | 1.425(7) |
| C(6)-C(7)   | 1.460(7) | C(39)-C(40) | 1.394(7) |
| C(7)-C(8)   | 1.398(7) | C(39)-C(44) | 1.520(7) |
| C(8)-C(9)   | 1.421(7) | C(40)-C(41) | 1.371(8) |
| C(9)-C(10)  | 1.407(7) | C(41)-C(42) | 1.393(8) |
| C(10)-C(11) | 1.361(7) | C(41)-C(45) | 1.509(8) |
| C(14)-C(15) | 1.392(7) | C(42)-C(43) | 1.389(7) |
| C(14)-C(23) | 1.497(6) | C(43)-C(46) | 1.523(7) |
| C(15)-C(16) | 1.412(6) | C(47)-C(48) | 1.367(8) |
| C(16)-C(17) | 1.500(7) | C(47)-C(52) | 1.375(7) |
| C(17)-C(22) | 1.377(7) | C(48)-C(49) | 1.368(8) |
| C(17)-C(18) | 1.395(7) | C(49)-C(50) | 1.378(8) |
| C(18)-C(19) | 1.386(7) | C(50)-C(51) | 1.360(7) |

|                  |            |                   |          |
|------------------|------------|-------------------|----------|
| C(51)-C(52)      | 1.379(8)   | C(1)-C(6)-C(7)    | 114.5(5) |
| C(53)-C(58)      | 1.346(12)  | N(1)-C(7)-C(8)    | 120.3(5) |
| C(53)-C(54)      | 1.396(13)  | N(1)-C(7)-C(6)    | 112.8(4) |
| C(54)-C(55)      | 1.358(13)  | C(8)-C(7)-C(6)    | 126.9(5) |
| C(55)-C(56)      | 1.374(13)  | C(7)-C(8)-C(9)    | 120.7(5) |
| C(56)-C(57)      | 1.360(11)  | N(2)-C(9)-C(10)   | 121.4(5) |
| C(57)-C(58)      | 1.342(12)  | N(2)-C(9)-C(8)    | 122.3(5) |
|                  |            | C(10)-C(9)-C(8)   | 116.3(5) |
| C(1)-Pt(1)-N(1)  | 81.63(19)  | C(11)-C(10)-C(9)  | 120.2(5) |
| C(1)-Pt(1)-O(2)  | 94.41(18)  | N(1)-C(11)-C(10)  | 124.0(5) |
| N(1)-Pt(1)-O(2)  | 176.03(15) | O(2)-C(14)-C(15)  | 127.5(5) |
| C(1)-Pt(1)-O(1)  | 174.04(17) | O(2)-C(14)-C(23)  | 114.3(4) |
| N(1)-Pt(1)-O(1)  | 92.73(14)  | C(15)-C(14)-C(23) | 118.2(5) |
| O(2)-Pt(1)-O(1)  | 91.21(12)  | C(14)-C(15)-C(16) | 127.2(5) |
| C(38)-B(1)-C(26) | 117.9(4)   | O(1)-C(16)-C(15)  | 123.2(5) |
| C(38)-B(1)-C(29) | 123.6(5)   | O(1)-C(16)-C(17)  | 116.1(4) |
| C(26)-B(1)-C(29) | 118.3(5)   | C(15)-C(16)-C(17) | 120.7(4) |
| C(16)-O(1)-Pt(1) | 126.4(3)   | C(22)-C(17)-C(18) | 117.7(5) |
| C(14)-O(2)-Pt(1) | 124.4(3)   | C(22)-C(17)-C(16) | 124.2(5) |
| C(11)-N(1)-C(7)  | 118.5(4)   | C(18)-C(17)-C(16) | 118.1(5) |
| C(11)-N(1)-Pt(1) | 125.2(3)   | C(19)-C(18)-C(17) | 120.4(5) |
| C(7)-N(1)-Pt(1)  | 116.3(3)   | C(20)-C(19)-C(18) | 120.7(5) |
| C(9)-N(2)-C(13)  | 122.3(5)   | C(19)-C(20)-C(21) | 118.9(5) |
| C(9)-N(2)-C(12)  | 120.2(5)   | C(22)-C(21)-C(20) | 120.3(5) |
| C(13)-N(2)-C(12) | 117.4(4)   | C(21)-C(22)-C(17) | 122.1(5) |
| C(2)-C(1)-C(6)   | 116.8(5)   | C(28)-C(23)-C(24) | 118.8(5) |
| C(2)-C(1)-Pt(1)  | 128.5(4)   | C(28)-C(23)-C(14) | 119.7(5) |
| C(6)-C(1)-Pt(1)  | 114.6(4)   | C(24)-C(23)-C(14) | 121.4(5) |
| C(3)-C(2)-C(1)   | 121.4(5)   | C(25)-C(24)-C(23) | 120.3(5) |
| C(2)-C(3)-C(4)   | 121.2(6)   | C(24)-C(25)-C(26) | 122.0(5) |
| C(5)-C(4)-C(3)   | 119.3(6)   | C(25)-C(26)-C(27) | 116.5(4) |
| C(4)-C(5)-C(6)   | 120.3(5)   | C(25)-C(26)-B(1)  | 121.4(5) |
| C(5)-C(6)-C(1)   | 121.0(5)   | C(27)-C(26)-B(1)  | 122.0(4) |
| C(5)-C(6)-C(7)   | 124.5(5)   | C(28)-C(27)-C(26) | 121.9(5) |

|                   |          |                   |           |
|-------------------|----------|-------------------|-----------|
| C(27)-C(28)-C(23) | 120.4(5) | C(47)-C(52)-C(51) | 120.9(6)  |
| C(34)-C(29)-C(30) | 117.1(5) | C(58)-C(53)-C(54) | 118.6(11) |
| C(34)-C(29)-B(1)  | 121.9(5) | C(55)-C(54)-C(53) | 121.2(12) |
| C(30)-C(29)-B(1)  | 120.9(5) | C(54)-C(55)-C(56) | 118.0(11) |
| C(31)-C(30)-C(29) | 120.1(5) | C(57)-C(56)-C(55) | 120.7(11) |
| C(31)-C(30)-C(35) | 119.6(5) | C(58)-C(57)-C(56) | 120.6(11) |
| C(29)-C(30)-C(35) | 120.2(5) | C(57)-C(58)-C(53) | 121.0(10) |
| C(32)-C(31)-C(30) | 122.0(5) |                   |           |
| C(31)-C(32)-C(33) | 117.9(5) |                   |           |
| C(31)-C(32)-C(37) | 121.1(5) |                   |           |
| C(33)-C(32)-C(37) | 121.0(5) |                   |           |
| C(34)-C(33)-C(32) | 121.8(5) |                   |           |
| C(33)-C(34)-C(29) | 121.0(5) |                   |           |
| C(33)-C(34)-C(36) | 117.2(5) |                   |           |
| C(29)-C(34)-C(36) | 121.8(5) |                   |           |
| C(43)-C(38)-C(39) | 116.3(5) |                   |           |
| C(43)-C(38)-B(1)  | 122.3(5) |                   |           |
| C(39)-C(38)-B(1)  | 121.2(5) |                   |           |
| C(40)-C(39)-C(38) | 120.9(5) |                   |           |
| C(40)-C(39)-C(44) | 117.7(5) |                   |           |
| C(38)-C(39)-C(44) | 121.3(5) |                   |           |
| C(41)-C(40)-C(39) | 122.3(6) |                   |           |
| C(40)-C(41)-C(42) | 117.4(5) |                   |           |
| C(40)-C(41)-C(45) | 120.9(6) |                   |           |
| C(42)-C(41)-C(45) | 121.7(6) |                   |           |
| C(43)-C(42)-C(41) | 122.6(6) |                   |           |
| C(42)-C(43)-C(38) | 120.5(5) |                   |           |
| C(42)-C(43)-C(46) | 118.5(5) |                   |           |
| C(38)-C(43)-C(46) | 121.0(5) |                   |           |
| C(48)-C(47)-C(52) | 119.5(6) |                   |           |
| C(47)-C(48)-C(49) | 119.8(6) |                   |           |
| C(48)-C(49)-C(50) | 120.6(6) |                   |           |
| C(51)-C(50)-C(49) | 120.1(6) |                   |           |
| C(50)-C(51)-C(52) | 119.2(6) |                   |           |

Table 4. Anisotropic displacement parameters ( $\text{\AA}^2 \times 10^3$ ) for Compd 4. The anisotropic displacement factor exponent takes the form:  $-2\pi^2 [ h^2 a^{*2} U^{11} + \dots + 2 h k a^* b^* U^{12} ]$

|       | $U^{11}$ | $U^{22}$ | $U^{33}$ | $U^{23}$ | $U^{13}$ | $U^{12}$ |
|-------|----------|----------|----------|----------|----------|----------|
| Pt(1) | 28(1)    | 27(1)    | 29(1)    | -2(1)    | 15(1)    | -2(1)    |
| B(1)  | 20(3)    | 29(3)    | 33(4)    | 0(3)     | 4(3)     | -1(2)    |
| O(1)  | 23(2)    | 20(2)    | 28(2)    | -2(1)    | 16(2)    | -6(1)    |
| O(2)  | 28(2)    | 33(2)    | 33(2)    | 0(2)     | 16(2)    | 0(2)     |
| N(1)  | 33(3)    | 28(2)    | 26(2)    | -1(2)    | 14(2)    | 1(2)     |
| N(2)  | 46(3)    | 36(3)    | 59(3)    | 6(2)     | 34(3)    | -1(2)    |
| C(1)  | 34(3)    | 26(3)    | 40(3)    | -6(2)    | 19(3)    | 2(2)     |
| C(2)  | 41(3)    | 43(3)    | 44(3)    | 1(3)     | 21(3)    | -3(3)    |
| C(3)  | 33(3)    | 55(4)    | 40(4)    | 4(3)     | 5(3)     | 5(3)     |
| C(4)  | 46(4)    | 55(4)    | 37(4)    | 11(3)    | 12(3)    | 8(3)     |
| C(5)  | 48(4)    | 43(3)    | 38(4)    | 8(3)     | 23(3)    | 8(3)     |
| C(6)  | 33(3)    | 26(3)    | 34(3)    | -2(2)    | 16(3)    | 3(2)     |
| C(7)  | 35(3)    | 21(3)    | 38(3)    | 1(2)     | 18(3)    | 4(2)     |
| C(8)  | 50(4)    | 27(3)    | 37(3)    | 4(2)     | 29(3)    | 6(3)     |
| C(9)  | 47(4)    | 26(3)    | 46(4)    | -2(2)    | 34(3)    | 1(2)     |
| C(10) | 29(3)    | 26(3)    | 44(4)    | -4(2)    | 22(3)    | -2(2)    |
| C(11) | 40(3)    | 29(3)    | 31(3)    | -5(2)    | 19(3)    | 1(2)     |
| C(12) | 44(4)    | 46(4)    | 70(4)    | -5(3)    | 37(4)    | -12(3)   |
| C(13) | 72(4)    | 39(3)    | 62(4)    | 1(3)     | 48(4)    | -2(3)    |
| C(14) | 32(3)    | 27(3)    | 36(3)    | -10(2)   | 17(3)    | -1(2)    |
| C(15) | 29(3)    | 31(3)    | 33(3)    | 0(2)     | 16(3)    | -4(2)    |
| C(16) | 30(3)    | 22(3)    | 34(3)    | -8(2)    | 18(3)    | -3(2)    |
| C(17) | 29(3)    | 25(3)    | 32(3)    | -7(2)    | 14(3)    | -3(2)    |
| C(18) | 35(3)    | 47(3)    | 31(3)    | -1(3)    | 15(3)    | -5(3)    |
| C(19) | 25(3)    | 52(4)    | 40(4)    | -6(3)    | 12(3)    | -9(3)    |
| C(20) | 43(4)    | 39(3)    | 31(3)    | 3(3)     | 11(3)    | 11(3)    |
| C(21) | 38(3)    | 41(3)    | 34(3)    | 4(3)     | 16(3)    | 0(3)     |
| C(22) | 35(4)    | 40(3)    | 39(3)    | 1(3)     | 22(3)    | -6(3)    |



|       |         |        |         |        |         |        |
|-------|---------|--------|---------|--------|---------|--------|
| C(23) | 23(3)   | 24(3)  | 38(3)   | -4(2)  | 15(3)   | -1(2)  |
| C(24) | 31(3)   | 37(3)  | 34(3)   | -6(2)  | 12(3)   | -5(2)  |
| C(25) | 30(3)   | 40(3)  | 32(3)   | -3(2)  | 15(3)   | -7(2)  |
| C(26) | 22(3)   | 27(3)  | 34(3)   | -7(2)  | 13(2)   | -2(2)  |
| C(27) | 23(3)   | 38(3)  | 35(3)   | -12(2) | 10(3)   | -6(2)  |
| C(28) | 29(3)   | 36(3)  | 32(3)   | -5(2)  | 16(3)   | -4(2)  |
| C(29) | 28(3)   | 31(3)  | 38(3)   | 2(2)   | 17(3)   | -1(2)  |
| C(30) | 26(3)   | 38(3)  | 37(3)   | 2(2)   | 14(3)   | -5(2)  |
| C(31) | 26(3)   | 39(3)  | 40(3)   | -2(3)  | 10(3)   | -8(2)  |
| C(32) | 46(3)   | 34(3)  | 44(3)   | -3(3)  | 17(3)   | -6(3)  |
| C(33) | 41(3)   | 29(3)  | 56(4)   | -4(3)  | 24(3)   | 3(3)   |
| C(34) | 31(3)   | 41(3)  | 42(4)   | -4(3)  | 16(3)   | -3(3)  |
| C(35) | 29(3)   | 43(3)  | 49(4)   | -3(3)  | 3(3)    | 0(3)   |
| C(36) | 34(4)   | 58(4)  | 66(5)   | -11(3) | 9(3)    | 8(3)   |
| C(37) | 69(5)   | 44(4)  | 69(5)   | -15(3) | 24(4)   | -5(3)  |
| C(38) | 24(3)   | 39(3)  | 37(3)   | -4(2)  | 13(3)   | -11(2) |
| C(39) | 21(3)   | 45(3)  | 42(4)   | 1(3)   | 9(3)    | -4(2)  |
| C(40) | 30(3)   | 61(4)  | 37(4)   | 10(3)  | 12(3)   | -1(3)  |
| C(41) | 29(3)   | 71(4)  | 43(3)   | -13(4) | 16(3)   | -11(3) |
| C(42) | 32(4)   | 53(4)  | 59(4)   | -18(3) | 22(3)   | -11(3) |
| C(43) | 34(3)   | 41(3)  | 47(4)   | -13(3) | 23(3)   | -12(3) |
| C(44) | 50(4)   | 47(4)  | 66(5)   | 22(3)  | 31(4)   | 10(3)  |
| C(45) | 70(5)   | 101(6) | 69(5)   | -11(4) | 48(4)   | -8(4)  |
| C(46) | 58(4)   | 35(3)  | 76(5)   | 2(3)   | 39(4)   | 3(3)   |
| C(47) | 61(4)   | 40(3)  | 42(4)   | -6(3)  | 24(4)   | -5(3)  |
| C(48) | 77(5)   | 37(3)  | 43(4)   | 4(3)   | 28(4)   | 9(4)   |
| C(49) | 52(5)   | 66(5)  | 66(5)   | 14(4)  | 26(4)   | 29(4)  |
| C(50) | 50(4)   | 54(4)  | 64(5)   | 2(3)   | 32(4)   | 2(3)   |
| C(51) | 52(4)   | 44(3)  | 38(4)   | 6(3)   | 19(3)   | 8(3)   |
| C(52) | 42(4)   | 52(4)  | 42(4)   | -1(3)  | 7(3)    | 1(3)   |
| C(53) | 140(10) | 77(7)  | 186(12) | 33(7)  | 100(10) | 17(7)  |
| C(54) | 171(13) | 88(8)  | 158(12) | -26(7) | 123(11) | -28(8) |
| C(55) | 240(17) | 67(7)  | 90(8)   | -16(5) | 113(11) | -26(8) |
| C(56) | 211(13) | 73(7)  | 70(6)   | 12(5)  | 86(8)   | 50(7)  |

|       |         |        |         |       |         |       |
|-------|---------|--------|---------|-------|---------|-------|
| C(57) | 152(10) | 106(8) | 126(9)  | 34(7) | 102(8)  | 48(7) |
| C(58) | 145(11) | 95(7)  | 177(12) | 55(8) | 111(10) | 24(7) |

Table 5. Hydrogen coordinates ( $\times 10^4$ ) and isotropic displacement parameters ( $\text{\AA}^2 \times 10^3$ ) for Compd 4.

|        | x    | y     | z     | U(eq) |
|--------|------|-------|-------|-------|
| H(2A)  | 1330 | 2000  | -819  | 51    |
| H(3A)  | 1068 | 2730  | -1816 | 57    |
| H(4A)  | 1278 | 4371  | -2246 | 59    |
| H(5A)  | 1764 | 5212  | -1675 | 51    |
| H(8A)  | 2246 | 5936  | -1042 | 41    |
| H(10A) | 2926 | 5255  | 645   | 38    |
| H(11A) | 2619 | 3737  | 847   | 39    |
| H(12A) | 3112 | 7493  | 471   | 74    |
| H(12B) | 3200 | 7765  | -47   | 74    |
| H(12C) | 3215 | 6033  | 216   | 74    |
| H(13A) | 2506 | 8065  | -1028 | 77    |
| H(13B) | 2670 | 6776  | -1225 | 77    |
| H(13C) | 2840 | 8347  | -886  | 77    |
| H(15A) | 1993 | -41   | 1653  | 37    |
| H(18A) | 2812 | 2137  | 1806  | 46    |
| H(19A) | 3240 | 1904  | 2725  | 49    |
| H(20A) | 3228 | 641   | 3528  | 49    |
| H(21A) | 2784 | -470  | 3390  | 46    |
| H(22A) | 2360 | -211  | 2485  | 43    |
| H(24A) | 1569 | -138  | 1633  | 42    |
| H(25A) | 1168 | -1581 | 1544  | 41    |
| H(27A) | 917  | -2404 | -203  | 40    |
| H(28A) | 1291 | -760  | -138  | 38    |
| H(31A) | 79   | -6438 | -932  | 45    |
| H(33A) | 917  | -8032 | -96   | 50    |
| H(35A) | -65  | -4151 | -618  | 70    |

|        |      |       |       |     |
|--------|------|-------|-------|-----|
| H(35B) | 163  | -2829 | -589  | 70  |
| H(35C) | 156  | -3351 | 9     | 70  |
| H(36A) | 1269 | -6871 | 838   | 88  |
| H(36B) | 1218 | -5120 | 1005  | 88  |
| H(36C) | 1302 | -5394 | 482   | 88  |
| H(37A) | 216  | -8688 | -1350 | 96  |
| H(37B) | 334  | -9766 | -763  | 96  |
| H(37C) | 550  | -9305 | -1026 | 96  |
| H(40A) | 569  | -4759 | 2179  | 54  |
| H(42A) | 376  | -281  | 1620  | 58  |
| H(44A) | 713  | -6591 | 1726  | 80  |
| H(44B) | 935  | -5918 | 1505  | 80  |
| H(44C) | 602  | -6344 | 1025  | 80  |
| H(45A) | 278  | -3154 | 2512  | 110 |
| H(45B) | 221  | -1336 | 2323  | 110 |
| H(45C) | 540  | -1900 | 2827  | 110 |
| H(46A) | 330  | 509   | 682   | 80  |
| H(46B) | 437  | -617  | 319   | 80  |
| H(46C) | 674  | 398   | 873   | 80  |
| H(47A) | 2027 | 2569  | 2633  | 58  |
| H(48A) | 1542 | 3461  | 2163  | 64  |
| H(49A) | 1181 | 2043  | 2254  | 75  |
| H(50A) | 1300 | -289  | 2801  | 64  |
| H(51A) | 1784 | -1177 | 3279  | 55  |
| H(52A) | 2147 | 257   | 3191  | 60  |
| H(53A) | 311  | 8270  | 7594  | 150 |
| H(54A) | 268  | 6264  | 8186  | 145 |
| H(55A) | 685  | 5034  | 8922  | 141 |
| H(56A) | 1148 | 5830  | 9063  | 132 |
| H(57A) | 1187 | 7865  | 8505  | 136 |
| H(58A) | 773  | 9031  | 7767  | 150 |

---

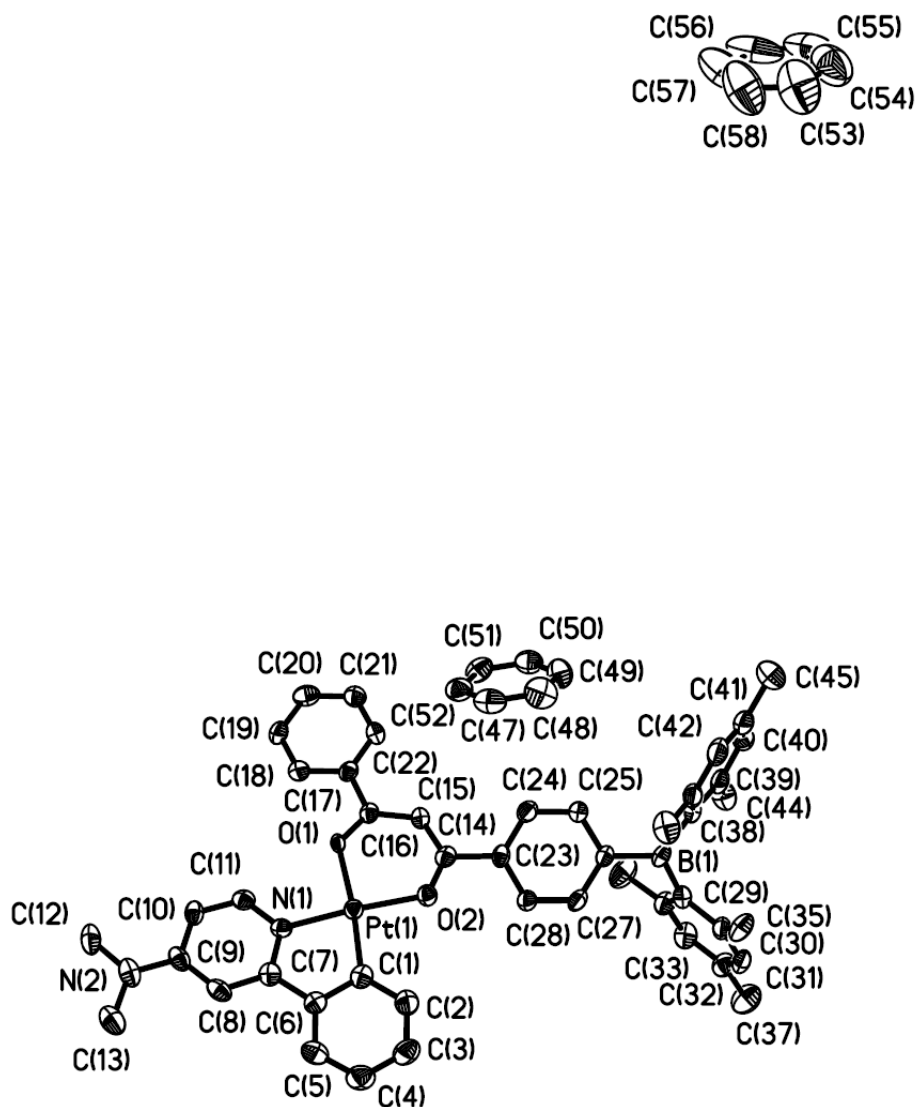

Figure S23. A diagram showing the structure of compound **4** and the two benzene solvent molecules with labeling schemes and 50% thermal ellipsoids. H atoms are omitted for clarity.

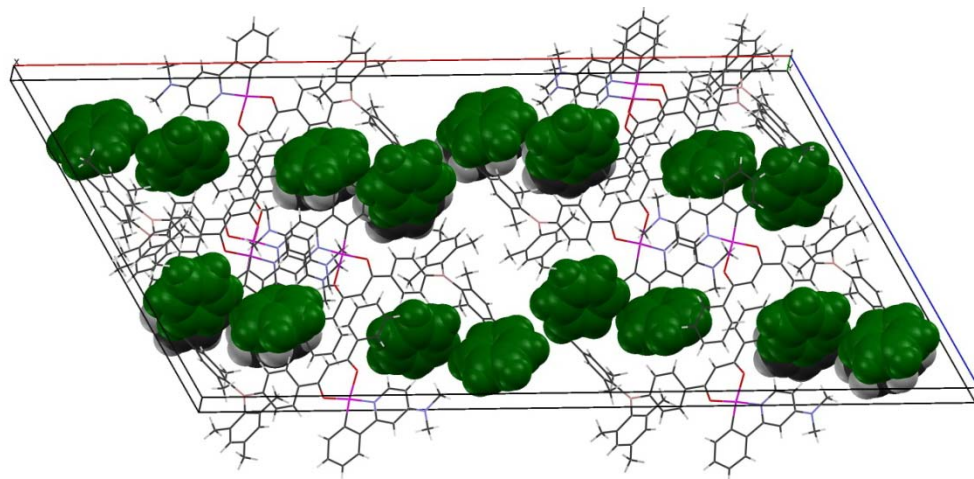

Figure S24. Unit cell packing diagram showing the benzene solvent molecules in the crystal lattice of compound **4**.
